1  
2  
3  
4  
5  
6  
7  
8  
9  
10  
11  
12  
13  
14  
15  
16  
17  
18  
19  
20  
21  
22  
23  
24  
25  
26  
27

## **Genotype-dependent and non-gradient patterns of RSV gene expression**

Felipe-Andrés Piedra<sup>1\*</sup>, Xueting Qiu<sup>3</sup>, Michael N. Teng<sup>6</sup>, Vasanthi Avadhanula<sup>1</sup>, Annette A. Machado<sup>1</sup>, Do-Kyun Kim<sup>4</sup>, James Hixson<sup>4</sup>, Justin Bahl<sup>3,5</sup>, Pedro A. Piedra<sup>1,2</sup>

<sup>1</sup>Department of Molecular Virology & Microbiology, Baylor College of Medicine, Houston, TX, United States of America

<sup>2</sup>Department of Pediatrics, Baylor College of Medicine, Houston, TX, United States of America

<sup>3</sup>Center for the Ecology of Infectious Diseases, Department of Infectious Diseases, College of Veterinary Medicine, University of Georgia, Athens, GA, United States of America

<sup>4</sup>Human Genetics Center, School of Public Health, University of Texas Health Science Center, Houston, TX, United States of America

<sup>5</sup>Program in Emerging Infectious Diseases, Duke-National University of Singapore Graduate Medical School, Singapore

<sup>6</sup>Division of Allergy and Immunology, Department of Internal Medicine, University of South Florida Morsani College of Medicine, Tampa, FL, United States of America

\*Corresponding author

E-mail: [Felipe-Andres.Piedra@bcm.edu](mailto:Felipe-Andres.Piedra@bcm.edu)

## 28 **Abstract**

29

30       Respiratory syncytial virus (RSV) is a nonsegmented negative-strand (NNS) RNA  
31 virus and a leading cause of severe lower respiratory tract illness in infants and the  
32 elderly. Transcription of the ten RSV genes proceeds sequentially from the 3' promoter  
33 and requires conserved gene start (GS) and gene end (GE) signals. Previous studies  
34 using the prototypical GA1 genotype Long and A2 strains have indicated a gradient of  
35 gene transcription. However, recent reports show data that appear inconsistent with a  
36 gradient. To better understand RSV transcriptional regulation, mRNA abundances from  
37 five RSV genes were measured by quantitative real-time PCR (qPCR) in three cell lines  
38 and cotton rats infected with virus isolates belonging to four different genotypes (GA1,  
39 ON, GB1, BA). Relative mRNA levels reached steady-state between four and 24 hours  
40 post-infection. Steady-state patterns were genotype-specific and non-gradient, where  
41 mRNA levels from the G (attachment) gene exceeded those from the more promoter-  
42 proximal N (nucleocapsid) gene across isolates. Transcript stabilities could not account  
43 for the non-gradient patterns observed, indicating that relative mRNA levels more  
44 strongly reflect transcription than decay. While the GS signal sequences were highly  
45 conserved, their alignment with N protein in the helical ribonucleocapsid, i.e., N-phase,  
46 was variable, suggesting polymerase recognition of GS signal conformation affects  
47 transcription initiation. The effect of GS N-phase on transcription efficiency was tested  
48 using dicistronic minigenomes. Ratios of minigenome gene expression showed a  
49 switch-like dependence on N-phase with a period of seven nucleotides. Our results  
50 indicate that RSV gene expression is in part sculpted by polymerases that initiate  
51 transcription with a probability dependent on GS signal N-phase.

## 52 **Author Summary**

53

54 RSV is a major viral pathogen that causes significant morbidity and mortality,  
55 especially in young children. Shortly after RSV enters a host cell, transcription from its  
56 nonsegmented negative-strand (NNS) RNA genome starts at the 3' promoter and  
57 proceeds sequentially. Transcriptional attenuation is thought to occur at each gene  
58 junction, resulting in a gradient of gene expression. However, recent studies showing  
59 non-gradient levels of RSV mRNA suggest that transcriptional regulation may have  
60 additional mechanisms. We show using RSV isolates belonging to four different  
61 genotypes that gene expression is genotype-dependent and one gene (the G or  
62 attachment gene) is consistently more highly expressed than an upstream neighbor. We  
63 hypothesize that variable alignment of highly conserved gene start (GS) signals with  
64 nucleoprotein (i.e., variable GS N-phase) can affect transcription and give rise to non-  
65 gradient patterns of gene expression. We show using dicistronic RSV minigenomes  
66 wherein the reporter genes differ only in the N-phase of one GS signal that GS N-phase  
67 affects gene expression. Our results suggest the existence of a novel mechanism of  
68 transcriptional regulation that might play a role in other NNS RNA viruses.

69

70

71

72

## 74 **Introduction**

75

76           Respiratory syncytial virus (RSV) can infect individuals repeatedly and is the  
77 most common pathogen associated with severe lower respiratory tract disease in  
78 children worldwide [1-5]. Numerous host-related and environmental risk factors for  
79 severe disease are known [6-8] while viral factors are less clear.

80           RSV is a nonsegmented negative-strand (NNS) RNA virus classified into two  
81 major subgroups, A and B, largely distinguished by antigenic differences in the  
82 attachment or G protein [9, 10]. The two subgroups are estimated to have diverged from  
83 an ancestral strain over 300 years ago [11] and have evolved into multiple co-circulating  
84 genotypes [11-15].

85           The RNA genome of RSV is embedded in interlinking and helix-forming subunits  
86 of nucleocapsid (N) protein, together forming the ribonucleocapsid (RNP) complex [16,  
87 17]. Viral mRNA are not encapsidated [17, 18]. Formation of the RNP complex requires  
88 high concentrations of N protein and a 5' terminal dinucleotide AC synthesized by the  
89 polymerase independently of template [18, 19]. Each subunit of N protein binds a seven  
90 nucleotide stretch of RNA via contacts with the sugar phosphate backbone, causing the  
91 RNA to adopt a conformation with a distinct configuration of solvent-exposed and buried  
92 nucleobases [16, 17]. Exposed nucleobases can presumably interact directly with viral  
93 polymerases bound to the RNP complex [16]. Moreover, the alignment of the viral RNA  
94 to the N protein within the RNP (N-phase) will determine its pattern of exposed and  
95 buried bases. The effects of N-phase on promoter recognition have been explored in  
96 RSV and some paramyxoviruses [18, 20-23]. N-phase affects RNA synthesis by

97 paramyxoviral RNA polymerases but, in RSV, promoter recognition is strongly  
98 determined by the proximity of the promoter sequence to the 3' terminus of the genome;  
99 replication is abolished if the core promoter starts six or more nucleotides from the 3'  
100 end [23]. Unlike its effects on promoter recognition and replication, the effects of N-  
101 phase on transcription are unexplored.

102         Transcription in RSV and other NNS viruses is sequential, with genes transcribed  
103 in their order of occurrence from the 3' promoter of the genome [18, 24-29]. Each of the  
104 ten genes of RSV contains essential gene start (GS) and gene end (GE) signals  
105 flanking the open reading frame (ORF) [30-32]. Transcription is initiated at the GS signal  
106 which also serves as a capping signal on the 5' end of the nascent mRNA [18, 33, 34].  
107 The polymerase then enters elongation mode until it reaches a GE signal, where the  
108 mRNA is polyadenylated and released [18, 30]. Two genes overlap at the 5' end of the  
109 RSV genome. The GE signal of matrix 2 (M2) occurs downstream of the GS signal of  
110 the large polymerase (L) gene. The polymerase must return from the M2 GE signal for  
111 full-length L mRNA to be made [35], suggesting that transcribing polymerases scan the  
112 RSV genome bidirectionally for a new GS signal after terminating transcription. Indeed,  
113 scanning polymerase dynamics may be a universal feature of NNS virus transcription  
114 [18, 36-38].

115         By homology with other NNS viruses, it is widely assumed that transcription in  
116 RSV follows a gradient, where the extent to which a gene is transcribed falls with its  
117 distance from the 3' promoter [29, 39, 40]. Earlier studies reported data consistent with  
118 a gradient [39, 41, 42]; however, recent studies show mRNA abundances that peak at  
119 the G gene, which is located in the middle of the genome [40, 43]. We recently reported

120 the G gene to be the most abundant in clinical samples obtained from RSV/A- and  
121 RSV/B-infected infants [44]. Thus, existing data suggest that patterns of RSV gene  
122 expression are more variable than has been assumed.

123 Here we explored the natural diversity of patterns of RSV gene expression by  
124 using qPCR to measure mRNA abundances of five different RSV genes (NS1, NS2, N,  
125 G, F) from isolates that we sequenced belonging to both subgroups and four different  
126 genotypes (RSV/A/GA1, RSV/A/ON, RSV/B/GB1, RSV/B/BA). Genotype-dependent  
127 patterns were observed, all diverging from a gradient and all showing higher levels of G  
128 mRNA than expected. Transcript stabilities did not account for the non-gradient patterns  
129 of mRNA levels. We analyzed GS signal sequence and N-phase, and hypothesized that  
130 GS signal N-phase can affect RSV gene expression on the basis of our findings. We  
131 found evidence supporting this hypothesis by measuring gene expression from RSV  
132 minigenomes encoding two reporter genes, where minigenomes differed only in the N-  
133 phase of one GS signal.

134

## 135 **Results**

136

### 137 **RSV mRNA abundances**

138

139 Oligonucleotide standards of known concentration were used to convert cycle  
140 threshold ( $C_T$ ) values measured by real-time PCR for mRNA targets (Fig 1A) to mRNA  
141 abundances. Twenty oligonucleotide standards and sets of reagents (primers and  
142 probe) were needed to quantify 20 mRNA targets (five genes in four isolates). All  
143 reagents gave rise to a similar range of  $C_T$  values for standards at equal concentrations  
144 (Fig 1B).

### 145 **Relative mRNA levels**

146

147 RSV isolates from both major subgroups (A and B) and four different genotypes  
148 (A/GA1/Tracy, A/ON/121301043A, B/GB1/18537, B/BA/80171) were used to infect  
149 HEp-2 cells (MOI = 0.01). Total mRNA abundances began to plateau at ~48 hours post-  
150 infection (pi) for all isolates (Fig 2A), consistent with the presence of significant viral  
151 cytopathic effect beyond this time-point. Relative mRNA levels were calculated for each  
152 isolate at each time-point by dividing the abundance of each mRNA by the total mRNA  
153 abundance (Fig 2B). Relative mRNA levels reached steady-state between four and 24  
154 hours pi (Fig 2B).

155 Consistent with sequential transcription, the relative levels of NS1 mRNA  
156 decreased for all isolates after four hours pi (GA1: -12%; ON: -5%; GB1: -6%; BA: -  
157 22%). Percent reductions were greater for the two RSV isolates, GA1 and BA, with  
158 lower total mRNA at four hours pi (avg. of GA1 and BA =  $170 \pm 70$  mRNA/reaction vs.  
159 avg. of ON and GB1 =  $890 \pm 170$  mRNA/reaction).

160 All four sets of steady-state mRNA levels were non-gradient, with levels of G  
161 mRNA exceeding levels of N mRNA (Fig 3). Steady-state mRNA levels also showed  
162 both subgroup- and genotype-specific differences (Fig 3). Between subgroups, relative  
163 levels of NS1 and NS2 were most different (Fig 3), with the two being similar in RSV/A,  
164 and with NS1 levels exceeding NS2 by a factor of ~5 in RSV/B (Fig 3). Within RSV/A,  
165 the level of NS1 exceeded NS2 in the GA1 isolate, and was matched by NS2 in the ON  
166 isolate (Fig 3). In RSV/B, the level of G mRNA exceeded N in the BA isolate (~5-fold  
167 greater) more than it did in the GB1 isolate (~2-fold greater) (Fig 3). Furthermore,  
168 genotype-specific steady-state mRNA levels were comparable in A549, Vero, and HEp2  
169 cell lines (Fig 4A).

170 We explored whether relative mRNA levels might change in the context of a fully  
171 immunocompetent host. A pair of cotton rats was infected with each virus isolate and  
172 both lung lavage (LL) and nasal wash (NW) samples were collected at four days pi.  
173 Relative mRNA levels were genotype-specific and similar in cotton rat LL and NW  
174 samples, and comparable to those measured *in vitro* (Fig 4B).

### 175 **RSV mRNA stabilities**

176

177 The observed divergence from a transcription gradient could be the result of  
178 differential stability of the RSV mRNAs. Therefore, we measured transcript stabilities by  
179 blocking transcription using the RSV RNA-dependent RNA polymerase (RdRp) inhibitor  
180 GS-5734 then monitoring mRNA levels by qPCR over time. Decay was measured for all  
181 five mRNAs from each of the four isolates in HEp-2 cells (Fig 5A). Exponential decay  
182 functions were fit to the data and half-lives were calculated from the decay constants.  
183 Half-lives ranged from 10 to 27 hours with a mean of  $16 \pm 5$  hours (Fig 5B). Distributions



184 of mRNA stabilities varied among the isolates, with GA1 having the greatest uniformity  
185 and lowest mean ( $= 12 \pm 1$  hours) (Fig 5A). Gene expression patterns were estimated  
186 by correcting measured mRNA abundances for degradation and recalculating relative  
187 mRNA levels (mRNA expressed = measured mRNA # \*  $e^{(\text{decay constant} * 24 \text{ hr})}$ ). Estimated  
188 levels of gene expression remained non-gradient; thus, differential mRNA stabilities do  
189 not account for the non-gradient patterns observed (Fig 5C). These data indicate that  
190 relative mRNA levels are 1) more strongly shaped by gene expression than decay and  
191 2) can safely be interpreted to reflect levels of gene expression.

## 192 **GS signal sequence and N-phase**

193

194 Whole genome sequences of the four RSV isolates were obtained by next-  
195 generation sequencing and analyzed for differences in GS signals that might help  
196 explain the non-gradient gene expression patterns observed. GS signals were highly  
197 conserved, with a single U to C substitution at position ten of the G gene GS signal (Fig  
198 6A).

199 We analyzed GS signal sequences for their alignment with N protein, as the  
200 alignment of a GS signal with bound N protein will affect its conformation and determine  
201 its configuration of solvent-exposed and buried nucleobases [16]. The alignment of a  
202 GS signal with N protein (N-phase) might therefore affect interactions with scanning  
203 polymerases and alter the likelihood of transcription initiation. We estimated the N-  
204 phase of each GS signal by calculating the remainder resulting from dividing the  
205 number of nucleotides separating the GS signal from the L GE signal by seven (the  
206 number of nucleotides bound by one subunit of N). The L GE signal was used as a  
207 proxy as the exact 5' terminus of each RSV genotype is not known. Thus, the estimated

208 GS signal N-phase will differ from the actual N-phase if the nucleotide length beyond  
209 the end of the L GE signal is not equal to an integer multiple of seven. However, every  
210 GS signal N-phase within a genotype would be uniformly affected, making estimated  
211 intra-genotype differences equal to actual intra-genotype differences. GS signal N-  
212 phase was highly variable, making it a potential source of the variation observed in  
213 patterns of gene expression (Fig 6B).

### 214 **Minigenomes to assess the effect of changing GS signal N-phase on gene** 215 **expression**

216

217 We hypothesized that changing GS signal N-phase would alter the likelihood of  
218 transcription initiation. To test our hypothesis, we designed plasmids encoding RSV  
219 minigenomes containing two reporter genes (Renilla luciferase and Firefly luciferase)  
220 each flanked by GS and GE signals [45, 46] (Fig 7A). We specifically altered the N-  
221 phase of the Firefly GS signal by introducing single nucleotide insertions within the  
222 adjoining 5' untranslated region (UTR) along with compensatory single nucleotide  
223 deletions within the adjoining intergenic region (Fig 7B). In this way, both the total length  
224 of the minigenome and the N-phase of all other sequences were fixed (Fig 7B). If gene  
225 expression occurred independently of GS signal N-phase, ratios of luciferase activity  
226 would remain constant. Measured ratios of luciferase activity showed a switch-like  
227 dependence on GS signal N-phase, with four states resulting in relatively high activity,  
228 two states with low, and one state with intermediate activity (Fig 7C). Ratios increased  
229 by as much as 50% relative to the minimum measured (Fig 7C). Thus the N-phase of  
230 the Firefly luciferase GS signal affected the relative level of gene expression, and by

231 inference, transcription initiation (Fig 7C). Furthermore, ratios of luciferase activity were  
232 consistent with a periodicity of seven nucleotides (Fig 7C).

233

## 234 **Discussion**

235

236 We observed genotype-dependent and non-gradient patterns of RSV gene  
237 expression. We hypothesize that non-gradient patterns require a mechanism to alter the  
238 likelihood of transcription initiation at different GS signals. GS signal sequences were  
239 highly conserved but varied in alignment with N protein, or N-phase, providing a  
240 potential source of biased transcription initiation. Using RSV minigenomes, we showed  
241 that varying GS signal N-phase can affect gene expression. These unexpected findings  
242 highlight gaps in our knowledge of RSV transcription and raise important issues relevant  
243 to future studies.

244 Accurate mRNA abundance measurements by qPCR require reagents that bind  
245 target without any mismatches [47, 48]. Perfectly designed and distinct sets of reagents  
246 can amplify target with variable efficiency, as the amplification efficiency depends on the  
247 physicochemical properties of the reagents (the free energies of different intra- and  
248 intermolecular interactions) and the qPCR conditions used. For our 20 oligonucleotide  
249 standards, we found the lowest melting temperature from each set of reagents  
250 correlated positively with amplification efficiencies and negatively with cycle threshold  
251 values (S1 Fig). These correlations indicate that physicochemical differences in the  
252 primers and probes can account for the minor variation observed in the amplification of

253 oligonucleotide standards, and support the accuracy of our approach to measuring viral  
254 mRNA abundances.

255         A gene expression gradient has been widely assumed for RSV, but supporting  
256 data come from a modest number of studies and are largely restricted to laboratory-  
257 adapted isolates (Long and A2) from the prototypic GA1 genotype of subgroup A. The  
258 first measurements were made by Collins and Wertz (1983) using an A2 strain in HEP-2  
259 cells [28, 42, 49]. They discovered the gene order of RSV and found it was  
260 approximated by decreasing mRNA abundances measured by northern blot [28, 42,  
261 49]. Barik later reported a gradient by dot blot hybridization of radiolabeled mRNAs  
262 produced *in vitro* using ribonucleoprotein (RNP) complex from an RSV Long strain and  
263 cell extract from uninfected HEP-2 cells [41]. Over a decade later, Boukhvalova et al.  
264 measured a gradient-like pattern by qPCR of mRNA abundances from an RSV Long  
265 strain grown in A549 cells [39]. In contrast, Aljabr et al. recently reported mRNA  
266 abundances by RNA-Seq from an A2 strain in HEP-2 cells that are inconsistent with a  
267 gradient. The most abundant mRNA they observed was associated with the G gene  
268 [40]. Levitz et al. reported the G gene to be the most highly expressed gene at later  
269 time-points in A549 cells infected with isolates from the RSV/B subgroup [43]. Thus,  
270 recent published data indicate that patterns of RSV gene expression vary and do not  
271 always follow a gradient. Here, we report data from isolates belonging to four different  
272 genotypes (GA1, ON, GB1, BA) showing variable and non-gradient patterns of gene  
273 expression and all with an apparent excess of G mRNA.

274         Studies of transcription in RSV and other NNS RNA viruses show that gene  
275 expression depends on a variety of factors. Among the factors affecting RSV gene

276 expression are sequences of GS and GE signals [30-32], intergenic (IG) sequences that  
277 can change how efficiently transcription is terminated or initiated [50, 51], and other  
278 factors including polymerase mutations and sequences of unknown function [52, 53].  
279 Our minigenome experiments add GS signal N-phase to the list of factors involved in  
280 RSV gene expression.

281 Our minigenome data suggest that polymerases preferentially initiate  
282 transcription at GS signals with certain solvent-exposed nucleobases (3C and 10U of  
283 the RSV GS signal). What accounts for this preference, and what events follow GS  
284 signal recognition and lead to either transcription initiation or continued scanning is  
285 unknown. It is interesting that the U to C substitution in position ten of the G gene GS  
286 signal has been shown to result in less not more transcription [30]. Thus, additional  
287 factor(s) beyond GS signal N-phase may account for over-expression of the G gene. It  
288 is worth stating that transcription initiation, being a molecular event, must be stochastic.  
289 RSV transcription is therefore sequential but likely *not obligatorily* sequential. A relative  
290 excess of G gene mRNA can occur from polymerases, more often than not, failing to  
291 initiate transcription at the N gene before initiating at the G gene. It is also possible that  
292 the N gene is usually expressed before the G gene, but G mRNA accumulates more  
293 because of polymerase scanning and increased re-initiation of transcription at G. Either  
294 scenario might contribute and both are consistent with the ultraviolet (UV) transcriptional  
295 mapping data underlying sequential transcription [24-26, 28].

296 Differences in luciferase activities from minigenomes are smaller than the  
297 differences observed in viral mRNA levels. Several factors might help explain this  
298 finding. First, the viral polymerase complex proteins (M2-1, N, P, L) that drive RNA

299 synthesis in the minigenome system are over-expressed by transfection of plasmids  
300 encoding codon-optimized genes. This over-abundance of polymerase proteins might  
301 not accurately represent the situation during RSV infection. Minigenomes are also  
302 proxies for full-length genomes, being shorter and having a simpler genetic structure.  
303 For instance, dicistronic minigenomes contain one pair of GS and GE signals straddling  
304 a single intergenic sequence while genomes contain nine variably spaced pairs of GS  
305 and GE signals straddling nine intergenic sequences of variable sequence and length.  
306 Interactions of transcribing and scanning polymerases with the structurally complex  
307 RSV genome might, in nonobvious ways, bias the expression of some genes over  
308 others. There could also be differences in the stability of the mRNAs or proteins for  
309 Renilla versus Firefly luciferase. Finally, concentrations of both luciferase proteins may  
310 have reached saturating intracellular levels prior to measurement (24 hr pi). Saturating  
311 protein concentrations would underrepresent differences in mRNA levels.

312 Our results show that transcription initiation by the RSV polymerase depends in  
313 part on GS signal N-phase. This potentially helps explain our and other recent  
314 observations of 1) non-gradient and 2) variable patterns of gene expression. The  
315 functional importance of genotype-dependent patterns of gene expression demands  
316 exploration. Finally, GS signal N-phase-regulated transcription initiation might also play  
317 a role in other NNS viruses.

318

## 319 **Materials and Methods**

320

### 321 **Virus strains**

322

323 RSV isolates were initially genotyped as described [13, 54] by sequencing a 270  
324 bp fragment in the second hypervariable region of the G gene. RSV/A/GA1/Tracy and  
325 RSV/B/GB1/18537 are prototypic strains isolated in 1989 and 1962, respectively [13],  
326 while RSV/A/ON/121301043A and RSV/B/BA/80171 are contemporaneous strains  
327 isolated in 2013 and 2010, respectively [55, 56].

### 328 **Cell-lines and cotton rats**

329

330 HEp-2 (ATCC CCL-23), A549 (ATCC CCL-185), and Vero (ATCC CCL-81) were  
331 cultured in minimal essential medium (MEM) containing 10% fetal bovine serum (FBS),  
332 1 µg/ml penicillin, streptomycin, and amphotericin B (PSA), and supplemented with L-  
333 glutamine.

334 Male and female *Sigmodon hispidus* cotton rats were bred and housed in the  
335 vivarium in Baylor College of Medicine. Cotton rats were ~75 to 150 g of body weight at  
336 the start of the experiments.

### 337 **Viral replication in cell culture and cotton rats**

338

339 The media from 70-90% confluent HEp-2, A549, or Vero cells in 24-well plates  
340 was aspirated, and 0.2 ml of virus diluted in MEM containing 2% FBS with antibiotics,  
341 antifungal, and L-glutamine (2% FBS-MEM) was added to replicate wells for each of the  
342 time-points to be acquired. Plates were incubated at 37°C and 5% CO<sub>2</sub> for 1 hour.  
343 Following infection, virus-containing media was aspirated and replaced with 1 ml of pre-  
344 warmed 2% FBS-MEM. Plates were incubated at 37°C and 5% CO<sub>2</sub> until sample

345 collection. At each time point, the media was aspirated and infected monolayers were  
346 lysed with 1X RIPA buffer and pelleted by centrifugation. The supernatant was flash  
347 frozen in a mixture of dry ice and 95% ethanol then stored at -80°C.

348 Eight- to ten-week-old male and female cotton rats were sedated and inoculated  
349 intranasally with  $10^5$  plaque forming units (pfu) of RSV as described [57]. Cotton rats  
350 were euthanized on day 4 post-infection. Nasal wash (NW) samples were collected from  
351 each cotton rat by disarticulating the jaw and washing with 2 ml of collection media (=   
352 Iscove's media containing 15% glycerin and mixed 1:1 with 2% FBS-MEM) through  
353 each nare, collecting the wash from the posterior opening of the pallet. Lung lavage (LL)  
354 samples were collected after the left lung lobe was removed and rinsed in sterile water  
355 to remove external blood contamination and weighed. The left lobe was transpleurally  
356 lavaged using 3 mL of collection media. Both NW and LL fluids were stored at -80°C.

### 357 **RNA extraction and reverse transcription**

358

359 Viral RNA was extracted from clarified cell lysates or samples obtained from  
360 cotton rats as described [55] by using the Mini Viral RNA Kit (Qiagen Sciences,  
361 Germantown, Maryland) and automated platform QIAcube (Qiagen, Hilden, Germany)  
362 according to the manufacturer's instructions. Complementary DNA (cDNA) was  
363 generated using the SuperScript™ IV First-Strand Synthesis System and oligo(dT)<sub>20</sub>  
364 primers according to the manufacturer's instructions (ThermoFisher Scientific).

### 365 **RSV mRNA abundance measurements**

366

367 Accurate mRNA abundance measurements by qPCR require reagents that bind  
368 target without any mismatches [47, 48]. Twenty sets of target-specific primers and



369 probes (from five mRNA targets for four virus isolates) were designed using whole  
370 genome sequences obtained by next-generation sequencing.  $C_T$  values were measured  
371 using the StepOnePlus Real-Time PCR System (ThermoFisher Scientific). Thresholding  
372 was performed according to the manufacturer's instructions [58].

373 Oligonucleotide standards were used to convert sample  $C_T$  values to mRNA  
374 abundances. Twenty oligonucleotide standards identical in sequence to the 20 targets  
375 of the specific primers and probes described above were purchased from IDT®,  
376 received lyophilized and resuspended in TE buffer pH 8. Each oligonucleotide standard  
377 was diluted to  $4 \times 10^6$  molecules/ $\mu$ l and further diluted serially to a concentration of 40  
378 molecules/ $\mu$ l in TE buffer. Duplicate  $C_T$  values were measured for each dilution and an  
379 average  $C_T$  was calculated. Average  $C_T$  values and known amounts (molecules/rxn)  
380 were used to construct a standard curve for each oligonucleotide standard.

381 For cDNAs derived from *in vitro* cell lysate or cotton rat samples,  $C_T$  values were  
382 measured in duplicate and used to calculate an average. Each average sample  $C_T$   
383 value was converted to an mRNA abundance using the linear relationship determined  
384 for the appropriate oligonucleotide standard  $C_T$  vs.  $\log_{10}$  of the oligonucleotide standard  
385 amount (molecules/rxn).

### 386 **RSV mRNA stability measurements**

387

388 Samples of HEp-2 cells infected with virus isolates at an MOI of 0.01 were  
389 collected from single wells of 24-well plates at multiple time-points up to 48 hours after  
390 addition of 100  $\mu$ M GS-5734. GS-5734 is a monophosphate prodrug of an adenosine  
391 nucleoside analog that binds a broad range of viral RNA-dependent RNA polymerases

392 (RdRps) and acts as an RNA chain terminator [59, 60]. Samples were collected as  
393 described above using 1X RIPA buffer to lyse infected cells, clarifying the lysate by  
394 centrifugation, and flash-freezing and storing the clarified lysate at -80°C. Viral RNA  
395 were extracted and converted to cDNA using oligo(dT)<sub>20</sub> primers. Transcript levels from  
396 RNase P (a host housekeeping gene) were measured using qPCR reagents acquired  
397 from the Centers for Disease Control and Prevention (CDC) and used to correct viral  
398 mRNA levels for well-to-well variation in the amount of sample obtained. Exponential  
399 decay functions were fit to the normalized data and used to calculate half-lives.  
400 Estimates of the amounts of mRNA expressed up to 24 hours pi were made by  
401 correcting the observed mRNA abundances at 24 hours pi for degradation using the  
402 exponential decay constants calculated (the number of expressed = the number of  
403 observed \*  $e^{(\text{decay constant} * 24 \text{ hr})}$ ) and assuming production of all observed mRNA at t = 0  
404 hours post-infection. This unrealistic assumption maximizes the effect of different rates  
405 of decay on the estimated levels of total expressed mRNA.

#### 406 **Whole genome sequencing and assembly**

407

408 cDNAs for sequencing were generated from viral RNA using the SuperScript™  
409 VILO™ cDNA Synthesis Kit and random hexamers (ThermoFisher Scientific). cDNAs  
410 were amplified using specific primers, and PCR products of each sample were purified  
411 and pooled [61]. Pooled PCR products (1 µg) were digested with the NEBNext dsDNA  
412 fragmentase kit (New England BioLabs, Inc., Ipswich, MA). Fragmented DNA was end-  
413 repaired with the NEBNext End Repair Module (New England BioLabs, Inc.). End-  
414 repaired DNA was ligated with the Ion P1 adaptor and unique Ion Xpress barcode  
415 adaptors (KAPA Adapter Kit 1–24; KAPABiosystems). Agencourt AMPure XP beads

416 (Beckman Coulter, Inc., Brea, CA) were used to selectively capture DNA between 100  
417 and 250 bp in length. All reaction products were purified with the Isolate II PCR kit  
418 (Bioline USA, Inc.). These libraries underwent nick translation and amplification.  
419 Experion Automated Electrophoresis System (Bio-Rad Laboratories, Inc., Hercules, CA)  
420 was used to confirm fragment lengths and molar concentrations. Equal molar amounts  
421 of all libraries were pooled and libraries were sequenced by Ion Proton™ System  
422 (ThermoFisher Scientific) generating 150 bp reads. Raw data, FASTQ and BAM files,  
423 were generated by the Torrent Suite™ Software (version 5.0.4; ThermoFisher  
424 Scientific).

425 Reads were assembled by Iterative Refinement Meta-Assembler (IRMA), which  
426 was designed for highly variable RNA viruses with more robust assembly and variant  
427 calling [62, 63]. IRMA v0.6.7 (<https://wonder.cdc.gov/amd/flu/irma/>) was used with an  
428 assembly module specifically designed for RSV.

#### 429 **Estimates of gene start (GS) signal N-phase**

430

431 GS signal N-phase was estimated from whole genome sequences using the end  
432 of the L (polymerase) GE signal [30]. The L GE signal (3'-UCAAUAAUUUUU-5';  
433 genome sense) was used as a proxy for the 5' end of the RSV genome. N-phase was  
434 calculated by determining the number of bases between the last U of the L GE and the  
435 first C of the GS (3'-CCCCGUUUUAU-5') then dividing by seven, representing the  
436 number of bases encapsidated by a single N molecule.

#### 437 **Minigenome experiments**

438

439 RSV minigenomes contained Renilla luciferase and Firefly luciferase genes  
440 flanked by the RSV A2 leader (le)-NS1 GS and L GE-trailer (Tr) sequences [45, 46].  
441 The Renilla and Firefly luciferase genes were separated by an N/M GE signal, SH-G  
442 intergenic (IG) sequence, and F GS signal of variable N-phase. The N-phase of the F  
443 GS signal was altered by sequentially deleting the nucleotide immediately 3' to the GS  
444 and inserting the same nucleotide immediately 5' of the F GS signal. Eight constructs  
445 were constructed assuming the periodicity of seven nucleotides established by Tawar et  
446 al. [16]. Minigenomes were co-transfected into BSR-T7 cells with expression plasmids  
447 encoding codon-optimized N, P, L, and M2-1 genes [45, 46]. Firefly and Renilla  
448 luciferase activities were measured at 24 hours post-transfection using Dual Luciferase  
449 Reagent (Promega) [46].

#### 450 **Ethics Statement**

451

452 All experimental protocols were approved by the Baylor College of Medicine's  
453 Institutional Animal Care and Use Committee (IACUC) (license # AN-2307). All  
454 experiments were conducted in accordance with the Guide for Care and Use of  
455 Laboratory Animals of the National Institutes of Health, as well as local, state and  
456 federal laws.

#### 457 **Accession numbers**

458

459 Sequences reported in this study were deposited in GenBank database under  
460 accession numbers MG813977-MG813995.

461

462 **Acknowledgements**

463

464           Thanks to Michel Perron of Gilead for providing the viral RdRp inhibitor GS-5734  
465 for use in experiments to measure RSV transcript stabilities. Thanks to Brian Gilbert  
466 from the Department of Molecular Virology and Microbiology at Baylor College of  
467 Medicine for providing the cotton rats needed to perform RSV infection studies. We  
468 thank Kim Tran for technical assistance.

469

## 470 **References**

471

- 472 1. American Academy of Pediatrics Subcommittee on D, Management of B. Diagnosis and  
473 management of bronchiolitis. *Pediatrics*. 2006;118(4):1774-93. doi: 10.1542/peds.2006-2223.  
474 PubMed PMID: 17015575.
- 475 2. Hasegawa K, Tsugawa Y, Brown DF, Mansbach JM, Camargo CA, Jr. Temporal trends  
476 in emergency department visits for bronchiolitis in the United States, 2006 to 2010. *Pediatr*  
477 *Infect Dis J*. 2014;33(1):11-8. doi: 10.1097/INF.0b013e3182a5f324. PubMed PMID: 23934206;  
478 PubMed Central PMCID: PMC3984903.
- 479 3. Mansbach JM, Piedra PA, Teach SJ, Sullivan AF, Forgey T, Clark S, et al. Prospective  
480 multicenter study of viral etiology and hospital length of stay in children with severe bronchiolitis.  
481 *Arch Pediatr Adolesc Med*. 2012;166(8):700-6. doi: 10.1001/archpediatrics.2011.1669. PubMed  
482 PMID: 22473882; PubMed Central PMCID: PMC3394902.
- 483 4. Nair H, Nokes DJ, Gessner BD, Dherani M, Madhi SA, Singleton RJ, et al. Global  
484 burden of acute lower respiratory infections due to respiratory syncytial virus in young children:  
485 a systematic review and meta-analysis. *Lancet*. 2010;375(9725):1545-55. doi: 10.1016/S0140-  
486 6736(10)60206-1. PubMed PMID: 20399493; PubMed Central PMCID: PMC32864404.
- 487 5. Zorc JJ, Hall CB. Bronchiolitis: recent evidence on diagnosis and management.  
488 *Pediatrics*. 2010;125(2):342-9. doi: 10.1542/peds.2009-2092. PubMed PMID: 20100768.
- 489 6. Simoes EA. Environmental and demographic risk factors for respiratory syncytial virus  
490 lower respiratory tract disease. *J Pediatr*. 2003;143(5 Suppl):S118-26. PubMed PMID:  
491 14615710.
- 492 7. Sommer C, Resch B, Simoes EA. Risk factors for severe respiratory syncytial virus  
493 lower respiratory tract infection. *Open Microbiol J*. 2011;5:144-54. doi:  
494 10.2174/1874285801105010144. PubMed PMID: 22262987; PubMed Central PMCID:  
495 PMC3258650.

- 496 8. Stein RT, Bont LJ, Zar H, Polack FP, Park C, Claxton A, et al. Respiratory syncytial virus  
497 hospitalization and mortality: Systematic review and meta-analysis. *Pediatr Pulmonol.*  
498 2017;52(4):556-69. doi: 10.1002/ppul.23570. PubMed PMID: 27740723; PubMed Central  
499 PMCID: PMCPMC5396299.
- 500 9. Collins PL, Melero JA. Progress in understanding and controlling respiratory syncytial  
501 virus: still crazy after all these years. *Virus Res.* 2011;162(1-2):80-99. doi:  
502 10.1016/j.virusres.2011.09.020. PubMed PMID: 21963675; PubMed Central PMCID:  
503 PMCPMC3221877.
- 504 10. Johnson PR, Spriggs MK, Olmsted RA, Collins PL. The G glycoprotein of human  
505 respiratory syncytial viruses of subgroups A and B: extensive sequence divergence between  
506 antigenically related proteins. *Proc Natl Acad Sci U S A.* 1987;84(16):5625-9. PubMed PMID:  
507 2441388; PubMed Central PMCID: PMCPMC298915.
- 508 11. Zlateva KT, Lemey P, Moes E, Vandamme AM, Van Ranst M. Genetic variability and  
509 molecular evolution of the human respiratory syncytial virus subgroup B attachment G protein. *J*  
510 *Virol.* 2005;79(14):9157-67. doi: 10.1128/JVI.79.14.9157-9167.2005. PubMed PMID: 15994810;  
511 PubMed Central PMCID: PMCPMC1168771.
- 512 12. Agoti CN, Munywoki PK, Phan MVT, Otieno JR, Kamau E, Bett A, et al. Transmission  
513 patterns and evolution of respiratory syncytial virus in a community outbreak identified by  
514 genomic analysis. *Virus Evol.* 2017;3(1):vex006. doi: 10.1093/ve/vex006. PubMed PMID:  
515 28458916; PubMed Central PMCID: PMCPMC5399923.
- 516 13. Tapia LI, Shaw CA, Aideyan LO, Jewell AM, Dawson BC, Haq TR, et al. Gene sequence  
517 variability of the three surface proteins of human respiratory syncytial virus (HRSV) in Texas.  
518 *PLoS One.* 2014;9(3):e90786. doi: 10.1371/journal.pone.0090786. PubMed PMID: 24625544;  
519 PubMed Central PMCID: PMCPMC3953119.
- 520 14. Schobel SA, Stucker KM, Moore ML, Anderson LJ, Larkin EK, Shankar J, et al.  
521 Respiratory Syncytial Virus whole-genome sequencing identifies convergent evolution of

- 522 sequence duplication in the C-terminus of the G gene. *Sci Rep.* 2016;6:26311. doi:  
523 10.1038/srep26311. PubMed PMID: 27212633; PubMed Central PMCID: PMC4876326.
- 524 15. Bose ME, He J, Shrivastava S, Nelson MI, Bera J, Halpin RA, et al. Sequencing and  
525 analysis of globally obtained human respiratory syncytial virus A and B genomes. *PLoS One.*  
526 2015;10(3):e0120098. doi: 10.1371/journal.pone.0120098. PubMed PMID: 25793751; PubMed  
527 Central PMCID: PMC4368745.
- 528 16. Tawar RG, Duquerroy S, Vonnrhein C, Varela PF, Damier-Piolle L, Castagne N, et al.  
529 Crystal structure of a nucleocapsid-like nucleoprotein-RNA complex of respiratory syncytial  
530 virus. *Science.* 2009;326(5957):1279-83. doi: 10.1126/science.1177634. PubMed PMID:  
531 19965480.
- 532 17. Ruigrok RW, Crepin T, Kolakofsky D. Nucleoproteins and nucleocapsids of negative-  
533 strand RNA viruses. *Curr Opin Microbiol.* 2011;14(4):504-10. doi: 10.1016/j.mib.2011.07.011.  
534 PubMed PMID: 21824806.
- 535 18. Noton SL, Fearn R. Initiation and regulation of paramyxovirus transcription and  
536 replication. *Virology.* 2015;479-480:545-54. doi: 10.1016/j.virol.2015.01.014. PubMed PMID:  
537 25683441; PubMed Central PMCID: PMC4424093.
- 538 19. Noton SL, Fearn R. The first two nucleotides of the respiratory syncytial virus  
539 antigenome RNA replication product can be selected independently of the promoter terminus.  
540 *RNA.* 2011;17(10):1895-906. doi: 10.1261/rna.2813411. PubMed PMID: 21878549; PubMed  
541 Central PMCID: PMC3185921.
- 542 20. Murphy SK, Ito Y, Parks GD. A functional antigenomic promoter for the paramyxovirus  
543 simian virus 5 requires proper spacing between an essential internal segment and the 3'  
544 terminus. *J Virol.* 1998;72(1):10-9. PubMed PMID: 9420195; PubMed Central PMCID:  
545 PMC109344.
- 546 21. Tapparel C, Maurice D, Roux L. The activity of Sendai virus genomic and antigenomic  
547 promoters requires a second element past the leader template regions: a motif (GNNNNN)<sub>3</sub> is



- 548 essential for replication. *J Virol.* 1998;72(4):3117-28. PubMed PMID: 9525637; PubMed Central  
549 PMCID: PMCPMC109762.
- 550 22. Vulliamoz D, Roux L. "Rule of six": how does the Sendai virus RNA polymerase keep  
551 count? *J Virol.* 2001;75(10):4506-18. doi: 10.1128/JVI.75.10.4506-4518.2001. PubMed PMID:  
552 11312321; PubMed Central PMCID: PMCPMC114204.
- 553 23. Samal SK, Collins PL. RNA replication by a respiratory syncytial virus RNA analog does  
554 not obey the rule of six and retains a nonviral trinucleotide extension at the leader end. *J Virol.*  
555 1996;70(8):5075-82. PubMed PMID: 8764015; PubMed Central PMCID: PMCPMC190462.
- 556 24. Abraham G, Banerjee AK. Sequential transcription of the genes of vesicular stomatitis  
557 virus. *Proc Natl Acad Sci U S A.* 1976;73(5):1504-8. PubMed PMID: 179088; PubMed Central  
558 PMCID: PMCPMC430325.
- 559 25. Ball LA, White CN. Order of transcription of genes of vesicular stomatitis virus. *Proc Natl*  
560 *Acad Sci U S A.* 1976;73(2):442-6. PubMed PMID: 174107; PubMed Central PMCID:  
561 PMCPMC335925.
- 562 26. Collins PL, Hightower LE, Ball LA. Transcriptional map for Newcastle disease virus. *J*  
563 *Virol.* 1980;35(3):682-93. PubMed PMID: 7420539; PubMed Central PMCID: PMCPMC288862.
- 564 27. Collins PL, Mink MA, Stec DS. Rescue of synthetic analogs of respiratory syncytial virus  
565 genomic RNA and effect of truncations and mutations on the expression of a foreign reporter  
566 gene. *Proc Natl Acad Sci U S A.* 1991;88(21):9663-7. PubMed PMID: 1946383; PubMed  
567 Central PMCID: PMCPMC52778.
- 568 28. Dickens LE, Collins PL, Wertz GW. Transcriptional mapping of human respiratory  
569 syncytial virus. *J Virol.* 1984;52(2):364-9. PubMed PMID: 6492254; PubMed Central PMCID:  
570 PMCPMC254535.
- 571 29. Whelan SP, Barr JN, Wertz GW. Transcription and replication of nonsegmented  
572 negative-strand RNA viruses. *Curr Top Microbiol Immunol.* 2004;283:61-119. PubMed PMID:  
573 15298168.

- 574 30. Kuo L, Fearn R, Collins PL. Analysis of the gene start and gene end signals of human  
575 respiratory syncytial virus: quasi-templated initiation at position 1 of the encoded mRNA. *J Virol.*  
576 1997;71(7):4944-53. PubMed PMID: 9188557; PubMed Central PMCID: PMC191725.
- 577 31. Kuo L, Grosfeld H, Cristina J, Hill MG, Collins PL. Effects of mutations in the gene-start  
578 and gene-end sequence motifs on transcription of monocistronic and dicistronic minigenomes of  
579 respiratory syncytial virus. *J Virol.* 1996;70(10):6892-901. PubMed PMID: 8794332; PubMed  
580 Central PMCID: PMC190738.
- 581 32. Sutherland KA, Collins PL, Peeples ME. Synergistic effects of gene-end signal mutations  
582 and the M2-1 protein on transcription termination by respiratory syncytial virus. *Virology.*  
583 2001;288(2):295-307. doi: 10.1006/viro.2001.1105. PubMed PMID: 11601901.
- 584 33. Barik S. The structure of the 5' terminal cap of the respiratory syncytial virus mRNA. *J*  
585 *Gen Virol.* 1993;74 ( Pt 3):485-90. doi: 10.1099/0022-1317-74-3-485. PubMed PMID: 8445369.
- 586 34. Liuzzi M, Mason SW, Cartier M, Lawetz C, McCollum RS, Dansereau N, et al. Inhibitors  
587 of respiratory syncytial virus replication target cotranscriptional mRNA guanylation by viral  
588 RNA-dependent RNA polymerase. *J Virol.* 2005;79(20):13105-15. doi:  
589 10.1128/JVI.79.20.13105-13115.2005. PubMed PMID: 16189012; PubMed Central PMCID:  
590 PMC1235819.
- 591 35. Fearn R, Collins PL. Model for polymerase access to the overlapped L gene of  
592 respiratory syncytial virus. *J Virol.* 1999;73(1):388-97. PubMed PMID: 9847343; PubMed  
593 Central PMCID: PMC103844.
- 594 36. Barr JN, Tang X, Hinzman E, Shen R, Wertz GW. The VSV polymerase can initiate at  
595 mRNA start sites located either up or downstream of a transcription termination signal but size  
596 of the intervening intergenic region affects efficiency of initiation. *Virology.* 2008;374(2):361-70.  
597 doi: 10.1016/j.virol.2007.12.023. PubMed PMID: 18241907; PubMed Central PMCID:  
598 PMC12593140.

- 599 37. Brauburger K, Boehmann Y, Kraehling V, Muhlberger E. Transcriptional Regulation in  
600 Ebola Virus: Effects of Gene Border Structure and Regulatory Elements on Gene Expression  
601 and Polymerase Scanning Behavior. *J Virol.* 2016;90(4):1898-909. doi: 10.1128/JVI.02341-15.  
602 PubMed PMID: 26656691; PubMed Central PMCID: PMC4733972.
- 603 38. Kolakofsky D, Le Mercier P, Iseni F, Garcin D. Viral DNA polymerase scanning and the  
604 gymnastics of Sendai virus RNA synthesis. *Virology.* 2004;318(2):463-73. PubMed PMID:  
605 15015496.
- 606 39. Boukhvalova MS, Prince GA, Blanco JC. Respiratory syncytial virus infects and  
607 abortively replicates in the lungs in spite of preexisting immunity. *J Virol.* 2007;81(17):9443-50.  
608 doi: 10.1128/JVI.00102-07. PubMed PMID: 17596309; PubMed Central PMCID:  
609 PMCPMC1951413.
- 610 40. Aljabr W, Touzelet O, Pollakis G, Wu W, Munday DC, Hughes M, et al. Investigating the  
611 Influence of Ribavirin on Human Respiratory Syncytial Virus RNA Synthesis by Using a High-  
612 Resolution Transcriptome Sequencing Approach. *J Virol.* 2016;90(10):4876-88. doi:  
613 10.1128/JVI.02349-15. PubMed PMID: 26656699; PubMed Central PMCID: PMC4859727.
- 614 41. Barik S. Transcription of human respiratory syncytial virus genome RNA in vitro:  
615 requirement of cellular factor(s). *J Virol.* 1992;66(11):6813-8. PubMed PMID: 1404620; PubMed  
616 Central PMCID: PMC240184.
- 617 42. Collins PL, Wertz GW. cDNA cloning and transcriptional mapping of nine  
618 polyadenylated RNAs encoded by the genome of human respiratory syncytial virus. *Proc Natl*  
619 *Acad Sci U S A.* 1983;80(11):3208-12. PubMed PMID: 6190173; PubMed Central PMCID:  
620 PMCPMC394009.
- 621 43. Levitz R, Gao Y, Dozmorov I, Song R, Wakeland EK, Kahn JS. Distinct patterns of  
622 innate immune activation by clinical isolates of respiratory syncytial virus. *PLoS One.*  
623 2017;12(9):e0184318. doi: 10.1371/journal.pone.0184318. PubMed PMID: 28877226; PubMed  
624 Central PMCID: PMC5587315.

- 625 44. Piedra FA, Mei M, Avadhanula V, Mehta R, Aideyan L, Garofalo RP, et al. The  
626 interdependencies of viral load, the innate immune response, and clinical outcome in children  
627 presenting to the emergency department with respiratory syncytial virus-associated bronchiolitis.  
628 PLoS One. 2017;12(3):e0172953. doi: 10.1371/journal.pone.0172953. PubMed PMID:  
629 28267794; PubMed Central PMCID: PMC5340370.
- 630 45. Dochow M, Krumm SA, Crowe JE, Jr., Moore ML, Plemper RK. Independent structural  
631 domains in paramyxovirus polymerase protein. J Biol Chem. 2012;287(9):6878-91. doi:  
632 10.1074/jbc.M111.325258. PubMed PMID: 22215662; PubMed Central PMCID:  
633 PMCPMC3307299.
- 634 46. Teng MN, Tran KC. Use of Minigenome Systems to Study RSV Transcription. Methods  
635 Mol Biol. 2016;1442:155-64. doi: 10.1007/978-1-4939-3687-8\_11. PubMed PMID: 27464693.
- 636 47. Boyle B, Dallaire N, MacKay J. Evaluation of the impact of single nucleotide  
637 polymorphisms and primer mismatches on quantitative PCR. BMC Biotechnol. 2009;9:75. doi:  
638 10.1186/1472-6750-9-75. PubMed PMID: 19715565; PubMed Central PMCID:  
639 PMCPMC2741440.
- 640 48. Suss B, Flekna G, Wagner M, Hein I. Studying the effect of single mismatches in primer  
641 and probe binding regions on amplification curves and quantification in real-time PCR. J  
642 Microbiol Methods. 2009;76(3):316-9. doi: 10.1016/j.mimet.2008.12.003. PubMed PMID:  
643 19135484.
- 644 49. Collins PL, Huang YT, Wertz GW. Identification of a tenth mRNA of respiratory syncytial  
645 virus and assignment of polypeptides to the 10 viral genes. J Virol. 1984;49(2):572-8. PubMed  
646 PMID: 6546401; PubMed Central PMCID: PMC5340370.
- 647 50. Hardy RW, Harmon SB, Wertz GW. Diverse gene junctions of respiratory syncytial virus  
648 modulate the efficiency of transcription termination and respond differently to M2-mediated  
649 antitermination. J Virol. 1999;73(1):170-6. PubMed PMID: 9847319; PubMed Central PMCID:  
650 PMCPMC103820.

- 651 51. Moudy RM, Sullender WM, Wertz GW. Variations in intergenic region sequences of  
652 Human respiratory syncytial virus clinical isolates: analysis of effects on transcriptional  
653 regulation. *Virology*. 2004;327(1):121-33. doi: 10.1016/j.virol.2004.06.013. PubMed PMID:  
654 15327903.
- 655 52. Cartee TL, Megaw AG, Oomens AG, Wertz GW. Identification of a single amino acid  
656 change in the human respiratory syncytial virus L protein that affects transcriptional termination.  
657 *J Virol*. 2003;77(13):7352-60. PubMed PMID: 12805433; PubMed Central PMCID:  
658 PMCPMC164798.
- 659 53. Harmon SB, Wertz GW. Transcriptional termination modulated by nucleotides outside  
660 the characterized gene end sequence of respiratory syncytial virus. *Virology*. 2002;300(2):304-  
661 15. PubMed PMID: 12350361.
- 662 54. Peret TC, Hall CB, Schnabel KC, Golub JA, Anderson LJ. Circulation patterns of  
663 genetically distinct group A and B strains of human respiratory syncytial virus in a community. *J*  
664 *Gen Virol*. 1998;79 ( Pt 9):2221-9. doi: 10.1099/0022-1317-79-9-2221. PubMed PMID: 9747732.
- 665 55. Avadhanula V, Chemaly RF, Shah DP, Ghantaji SS, Azzi JM, Aideyan LO, et al.  
666 Infection with novel respiratory syncytial virus genotype Ontario (ON1) in adult hematopoietic  
667 cell transplant recipients, Texas, 2011-2013. *J Infect Dis*. 2015;211(4):582-9. doi:  
668 10.1093/infdis/jiu473. PubMed PMID: 25156562.
- 669 56. Nicholson EG, Schlegel C, Garofalo RP, Mehta R, Scheffler M, Mei M, et al. Robust  
670 Cytokine and Chemokine Response in Nasopharyngeal Secretions: Association With  
671 Decreased Severity in Children With Physician Diagnosed Bronchiolitis. *J Infect Dis*.  
672 2016;214(4):649-55. doi: 10.1093/infdis/jiw191. PubMed PMID: 27190183; PubMed Central  
673 PMCID: PMCPMC4957440.
- 674 57. Stobart CC, Rostad CA, Ke Z, Dillard RS, Hampton CM, Strauss JD, et al. A live RSV  
675 vaccine with engineered thermostability is immunogenic in cotton rats despite high attenuation.  
676 *Nat Commun*. 2016;7:13916. doi: 10.1038/ncomms13916. PubMed PMID: 28000669; PubMed

677 Central PMCID: PMCPMC5187593 for the Company. M.L.M., C.C.S., A.L.H., J.M. and C.A.R.  
678 are co-inventors of RSV vaccine technology subject to evaluation in this paper. The vaccine  
679 technology has been optioned to Meissa by Emory University. The remaining authors declare  
680 no competing financial interests.

681 58. AB StepOne and StepOnePlus Real-Time PCR Systems - Relative Standard Curve and  
682 Comparative CT Experiments. 2008.

683 59. Lo MK, Jordan R, Arvey A, Sudhamsu J, Shrivastava-Ranjan P, Hotard AL, et al. GS-  
684 5734 and its parent nucleoside analog inhibit Filo-, Pneumo-, and Paramyxoviruses. *Sci Rep*.  
685 2017;7:43395. doi: 10.1038/srep43395. PubMed PMID: 28262699; PubMed Central PMCID:  
686 PMCPMC5338263.

687 60. Warren TK, Jordan R, Lo MK, Ray AS, Mackman RL, Soloveva V, et al. Therapeutic  
688 efficacy of the small molecule GS-5734 against Ebola virus in rhesus monkeys. *Nature*.  
689 2016;531(7594):381-5. doi: 10.1038/nature17180. PubMed PMID: 26934220; PubMed Central  
690 PMCID: PMCPMC5551389.

691 61. Agoti CN, Otieno JR, Munywoki PK, Mwihuri AG, Cane PA, Nokes DJ, et al. Local  
692 evolutionary patterns of human respiratory syncytial virus derived from whole-genome  
693 sequencing. *J Virol*. 2015;89(7):3444-54. doi: 10.1128/JVI.03391-14. PubMed PMID: 25609811;  
694 PubMed Central PMCID: PMCPMC4403408.

695 62. Shepard SS, Meno S, Bahl J, Wilson MM, Barnes J, Neuhaus E. Erratum to: Viral deep  
696 sequencing needs an adaptive approach: IRMA, the iterative refinement meta-assembler. *BMC*  
697 *Genomics*. 2016;17(1):801. doi: 10.1186/s12864-016-3138-8. PubMed PMID: 27737640;  
698 PubMed Central PMCID: PMCPMC5064889.

699 63. Shepard SS, Meno S, Bahl J, Wilson MM, Barnes J, Neuhaus E. Viral deep sequencing  
700 needs an adaptive approach: IRMA, the iterative refinement meta-assembler. *BMC Genomics*.  
701 2016;17:708. doi: 10.1186/s12864-016-3030-6. PubMed PMID: 27595578; PubMed Central  
702 PMCID: PMCPMC5011931.



704 **Supporting Information Legends**

705

706 **S1 Fig. Amplification efficiencies positively correlate and  $C_T$  values negatively**  
707 **correlate with the minimum melting temperature (min.  $T_m$ ) of the target-specific**  
708 **qPCR reagents used. (a) Pearson correlation for amplification efficiencies vs. min.  $T_m$ :**  
709  **$R=0.57$ ,  $p=0.0086$ . (b) Pearson correlations for  $C_T$  values measured at the extremes of**  
710 **target quantity (200 and  $2 \times 10^7$  molecules / rxn) vs. min.  $T_m$ :  $R=-0.65$ ,  $p=0.002$  and**  
711  **$R=-0.66$ ,  $p=0.0015$ , respectively.**

712

713

714

715

716

717

718

719

720

721

722

723



724 **Fig 1. qPCR-based measurements of mRNA abundances from five RSV genes and**  
725 **four different virus isolates using oligonucleotide standards. (a)** Five of 10 RSV  
726 genes were chosen for mRNA abundance measurements by qPCR. The 5 genes (NS1,  
727 NS2, N, G, & F) span half of the nucleotide length of the 15.2 kb genome and its entire  
728 gene length minus the final two genes, M2 and L. **(b)** Known amounts of different  
729 oligonucleotide standards were detected over a similar range of cycle threshold ( $C_T$ )  
730 values. Twenty different oligonucleotide standards at known concentrations were  
731 needed (4 virus isolates x 5 mRNA targets) to convert  $C_T$  values measured for viral  
732 mRNA targets into mRNA abundances. Each dot represents the mean  $C_T$  of duplicate  
733 measurements of an oligonucleotide standard at a known concentration or quantity (=   
734 number of molecules / qPCR rxn). Dots of like color are dilutions of the same  
735 oligonucleotide standard.

736 **Fig 2. Total mRNA abundances plateau beyond 48 hours post-infection and**  
737 **relative mRNA levels reach steady-state soon after the start of infection. (a)** Total  
738 mRNA abundances (= NS1+NS2+N+G+F) from HEp-2 cells infected with different  
739 isolates of RSV (MOI = 0.01) begin to plateau by ~48 hours post-infection (pi). Each dot  
740 (RSV/A/GA1Tracy [pale blue]; RSV/A/ON/121301043A [dark blue]; RSV/B/GB1/18537  
741 [light green]; RSV/B/BA/80171 [dark green]) represents the mean and error bars the  
742 standard deviation of two independent experiments (n=2). For each independent  
743 experiment, the mean was calculated from duplicate measurements and used in  
744 subsequent calculations. **(b)** Relative mRNA levels reach steady-state sometime  
745 between four and 24 hours pi. Histograms depicting relative mRNA levels are shown for  
746 all measured time-points (4, 24, 48, 72 hr pi) and all four isolates (color scheme same

747 as (a)). Each bar depicts the mean mRNA # / total mRNA # of the indicated species and  
748 error bars show the standard deviation (n = 2). For each independent experiment, the  
749 mean was calculated from duplicate measurements and used in subsequent  
750 calculations.

751 **Fig 3. Relative mRNA levels are genotype-specific and non-gradient.** Grey bars  
752 depict relative mRNA levels expected from an expression gradient resulting from a 20%  
753 decrease in transcription at every gene junction. Each dot depicts the mean mRNA # /  
754 total mRNA # observed for the indicated species and isolate (RSV/A/GA1Tracy [pale  
755 blue]; RSV/A/ON/121301043A [dark blue]; RSV/B/GB1/18537 [light green];  
756 RSV/B/BA/80171 [dark green]) in HEp-2 cells (MOI = 0.01) at steady-state. Steady-state  
757 mean relative mRNA levels and standard deviation were calculated using the mean of  
758 each relevant time-point (24, 48, 72 hours post-infection). The mean of each time-point  
759 was calculated from two independent experiments, and the mean from each experiment  
760 was calculated from duplicate measurements as described.

761 **Fig 4. Relative mRNA levels are comparable in different cell lines and in nasal**  
762 **wash and lung lavage samples from infected cotton rats. (a)** Relative mRNA levels  
763 are comparable in different cell lines. Viral mRNA levels were measured from infected  
764 A549 (in yellow), Vero (in orange), and HEp-2 (in blue) cell lines (MOI = 0.01) at 24  
765 hours post-infection (pi). Each bar depicts the mean mRNA # / total mRNA # of the  
766 indicated species and error bars show the standard deviation (n = 2). For each  
767 independent experiment, the mean was calculated from duplicate measurements and  
768 used in subsequent calculations. **(b)** Relative mRNA levels are comparable in lung  
769 lavage (LL) and nasal wash (NW) samples from infected cotton rats. Each bar depicts

770 the mean mRNA # / total mRNA # of the indicated species and error bars show the  
771 standard deviation calculated from duplicate measurements of the same sample.  
772 Results from LL samples collected 4 days pi are shown in blue (cotton rat A = light blue;  
773 cotton rat B = dark blue) and NW samples shown in green (cotton rat A = light green;  
774 cotton rat B = dark green).

775 **Fig 5. Transcript stabilities do not account for non-gradient patterns, indicating**  
776 **that relative mRNA levels strongly reflect RSV gene expression. (a)** Viral mRNAs  
777 decay after addition of GS-5734, a viral polymerase inhibitor. Viral mRNA levels were  
778 divided by RNase P mRNA levels to control for well-to-well variation in the amount of  
779 sample obtained, then normalized. Each dot represents the mean normalized mRNA #  
780 and error bars the standard deviation of two independent experiments (n=2). For each  
781 independent experiment, a mean was calculated from the means of two different  
782 samples; and each sample mean was obtained from duplicate measurements. **(b)**  
783 Decay constants obtained from exponential decay functions fit to each data set were  
784 used to calculate mRNA half-lives (RSV/A/GA1Tracy [pale blue];  
785 RSV/A/ON/121301043A [dark blue]; RSV/B/GB1/18537 [light green]; RSV/B/BA/80171  
786 [dark green]). **(c)** Transcript stabilities cannot account for non-gradient mRNA levels.  
787 Grey bars depict relative mRNA levels expected from an expression gradient resulting  
788 from a 20% decrease in transcription at every gene junction. Each dot depicts the mean  
789 expressed mRNA # / total expressed mRNA # estimated for the indicated mRNA  
790 species and virus isolate in HEp-2 cells (MOI = 0.01) at 24 hours post-infection (mRNA  
791 expressed = mRNA # observed \*  $e^{(\text{decay constant} * 24 \text{ hr})}$ ).

792 **Fig 6. GS signal sequence is highly conserved but alignment with N protein (N-**  
793 **phase) is variable, revealing a potential source of genotype-specific and non-**  
794 **gradient gene expression patterns. (a)** GS signals are highly conserved and show  
795 only a U to C substitution at position ten of the G gene GS signal. (Genomic, i.e.,  
796 negative-strand, sequence displayed). **(b)** GS signals have variable N-phase. Diagrams  
797 show the estimated GS signal N-phase for each gene whose mRNA levels were  
798 measured (NS1 (cyan), NS2 (green), N (tawny), G (purple), & F (charcoal)) from the 4  
799 virus isolates used.

800 **Fig 7. Gene expression changes with GS signal N-phase in minigenomes**  
801 **encoding two luciferase enzymes. (a)** A minigenome encoding two reporter genes,  
802 the second with variable GS signal N-phase. RSV minigenomes contained Renilla and  
803 Firefly luciferase genes separated by an N GE signal, SH/G intergenic (IG) sequence,  
804 and F GS signal of variable N-phase. **(b)** The F GS signal and neighboring sequences  
805 in minigenomes with variable GS signal N-phase. In *italics*: SH-G intergenic (IG)  
806 sequence; in **bold**: consensus GS signal sequence; underlined: F GS signal sequence  
807 block. (Genomic, i.e., negative-strand, sequence displayed). **(c)** Changing ratios of  
808 Firefly to Renilla luciferase activity indicate that GS signal N-phase can affect gene  
809 expression. Each bar represents the mean and error bars the standard deviation of  
810 measurements of four samples taken at 24 hr pi from a single experiment.

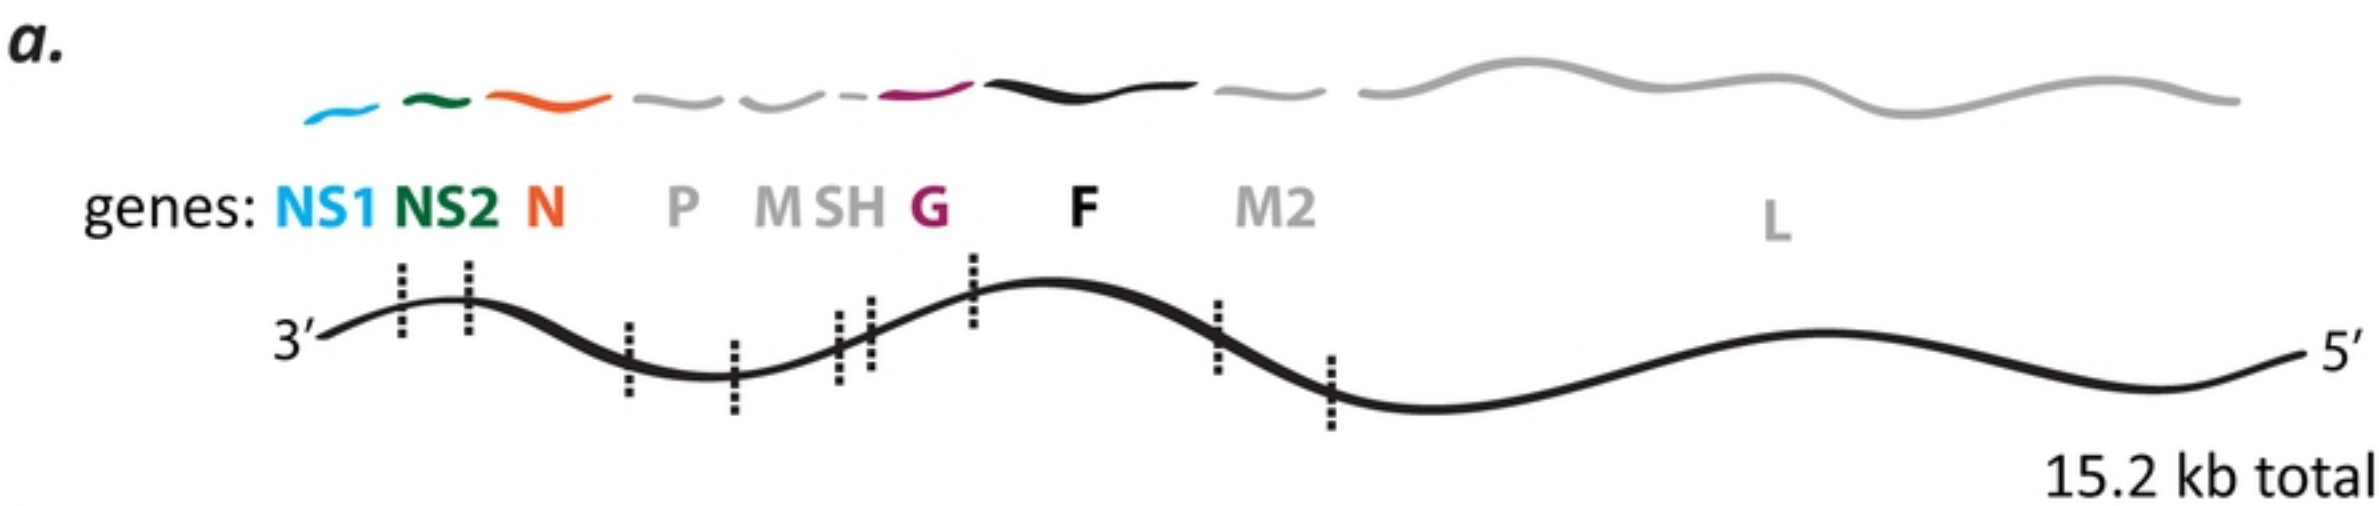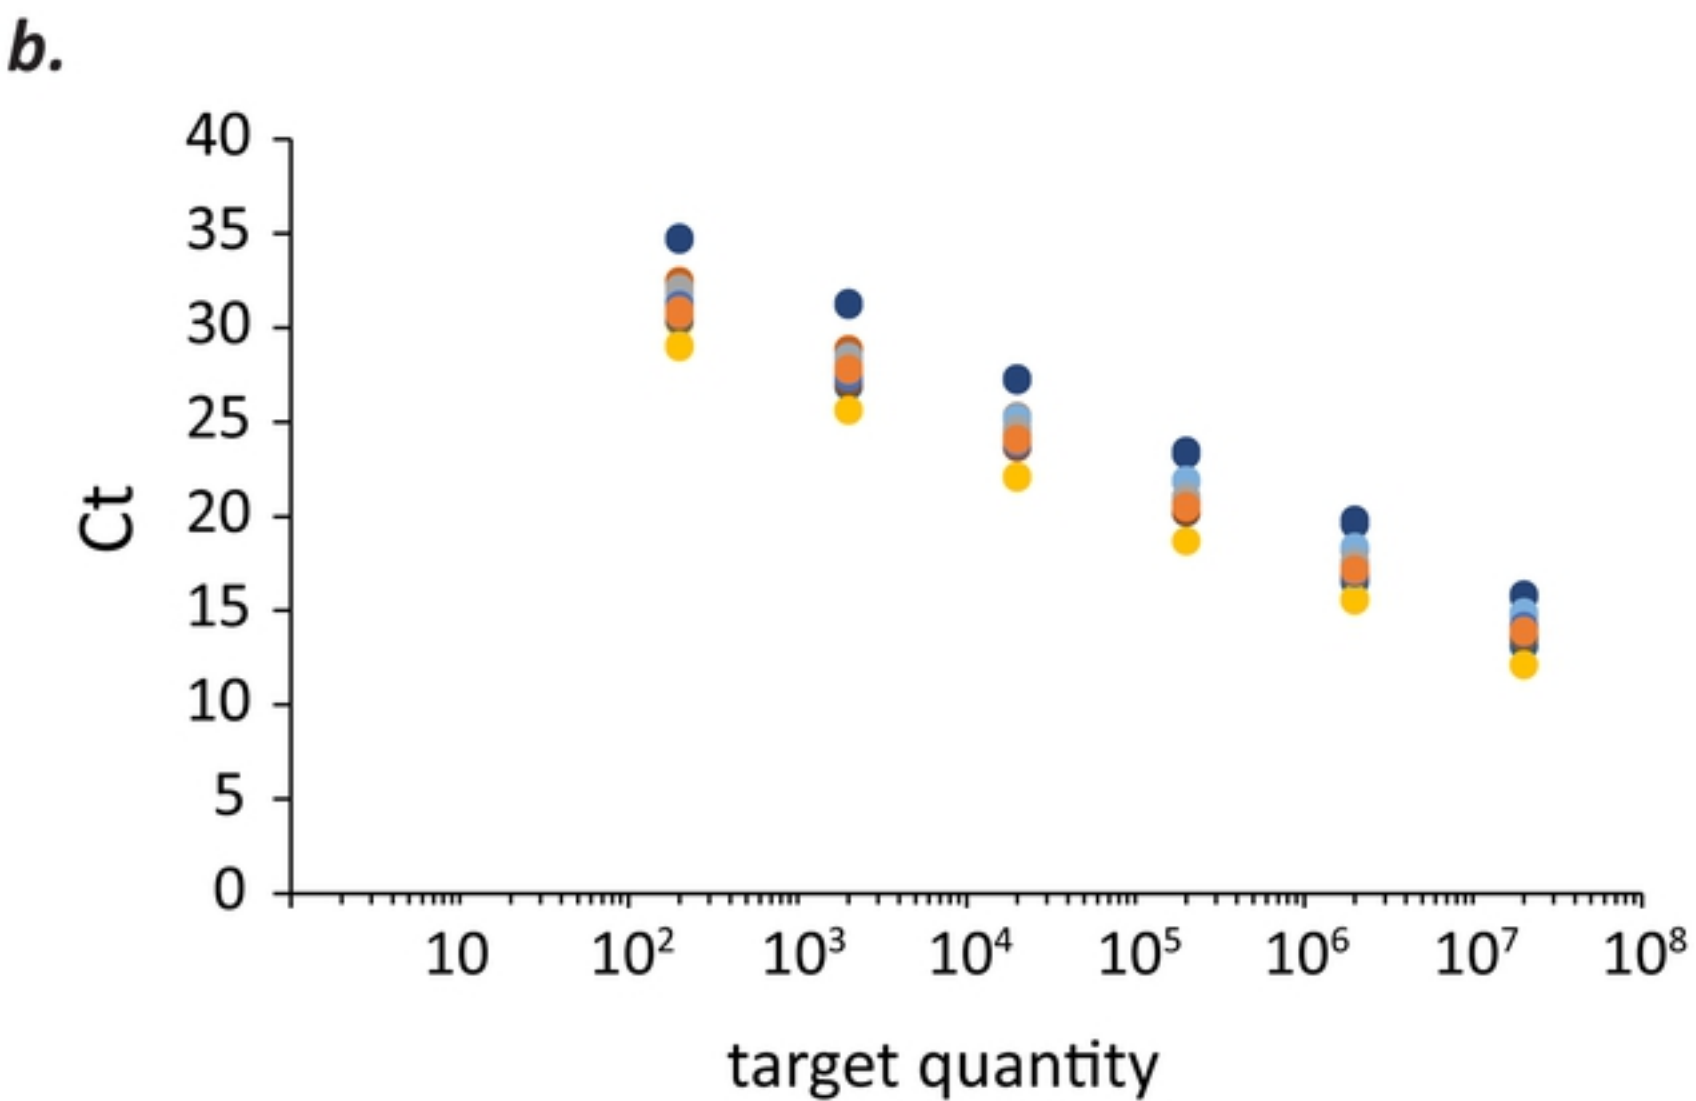

**Fig 1.**

Fig 1

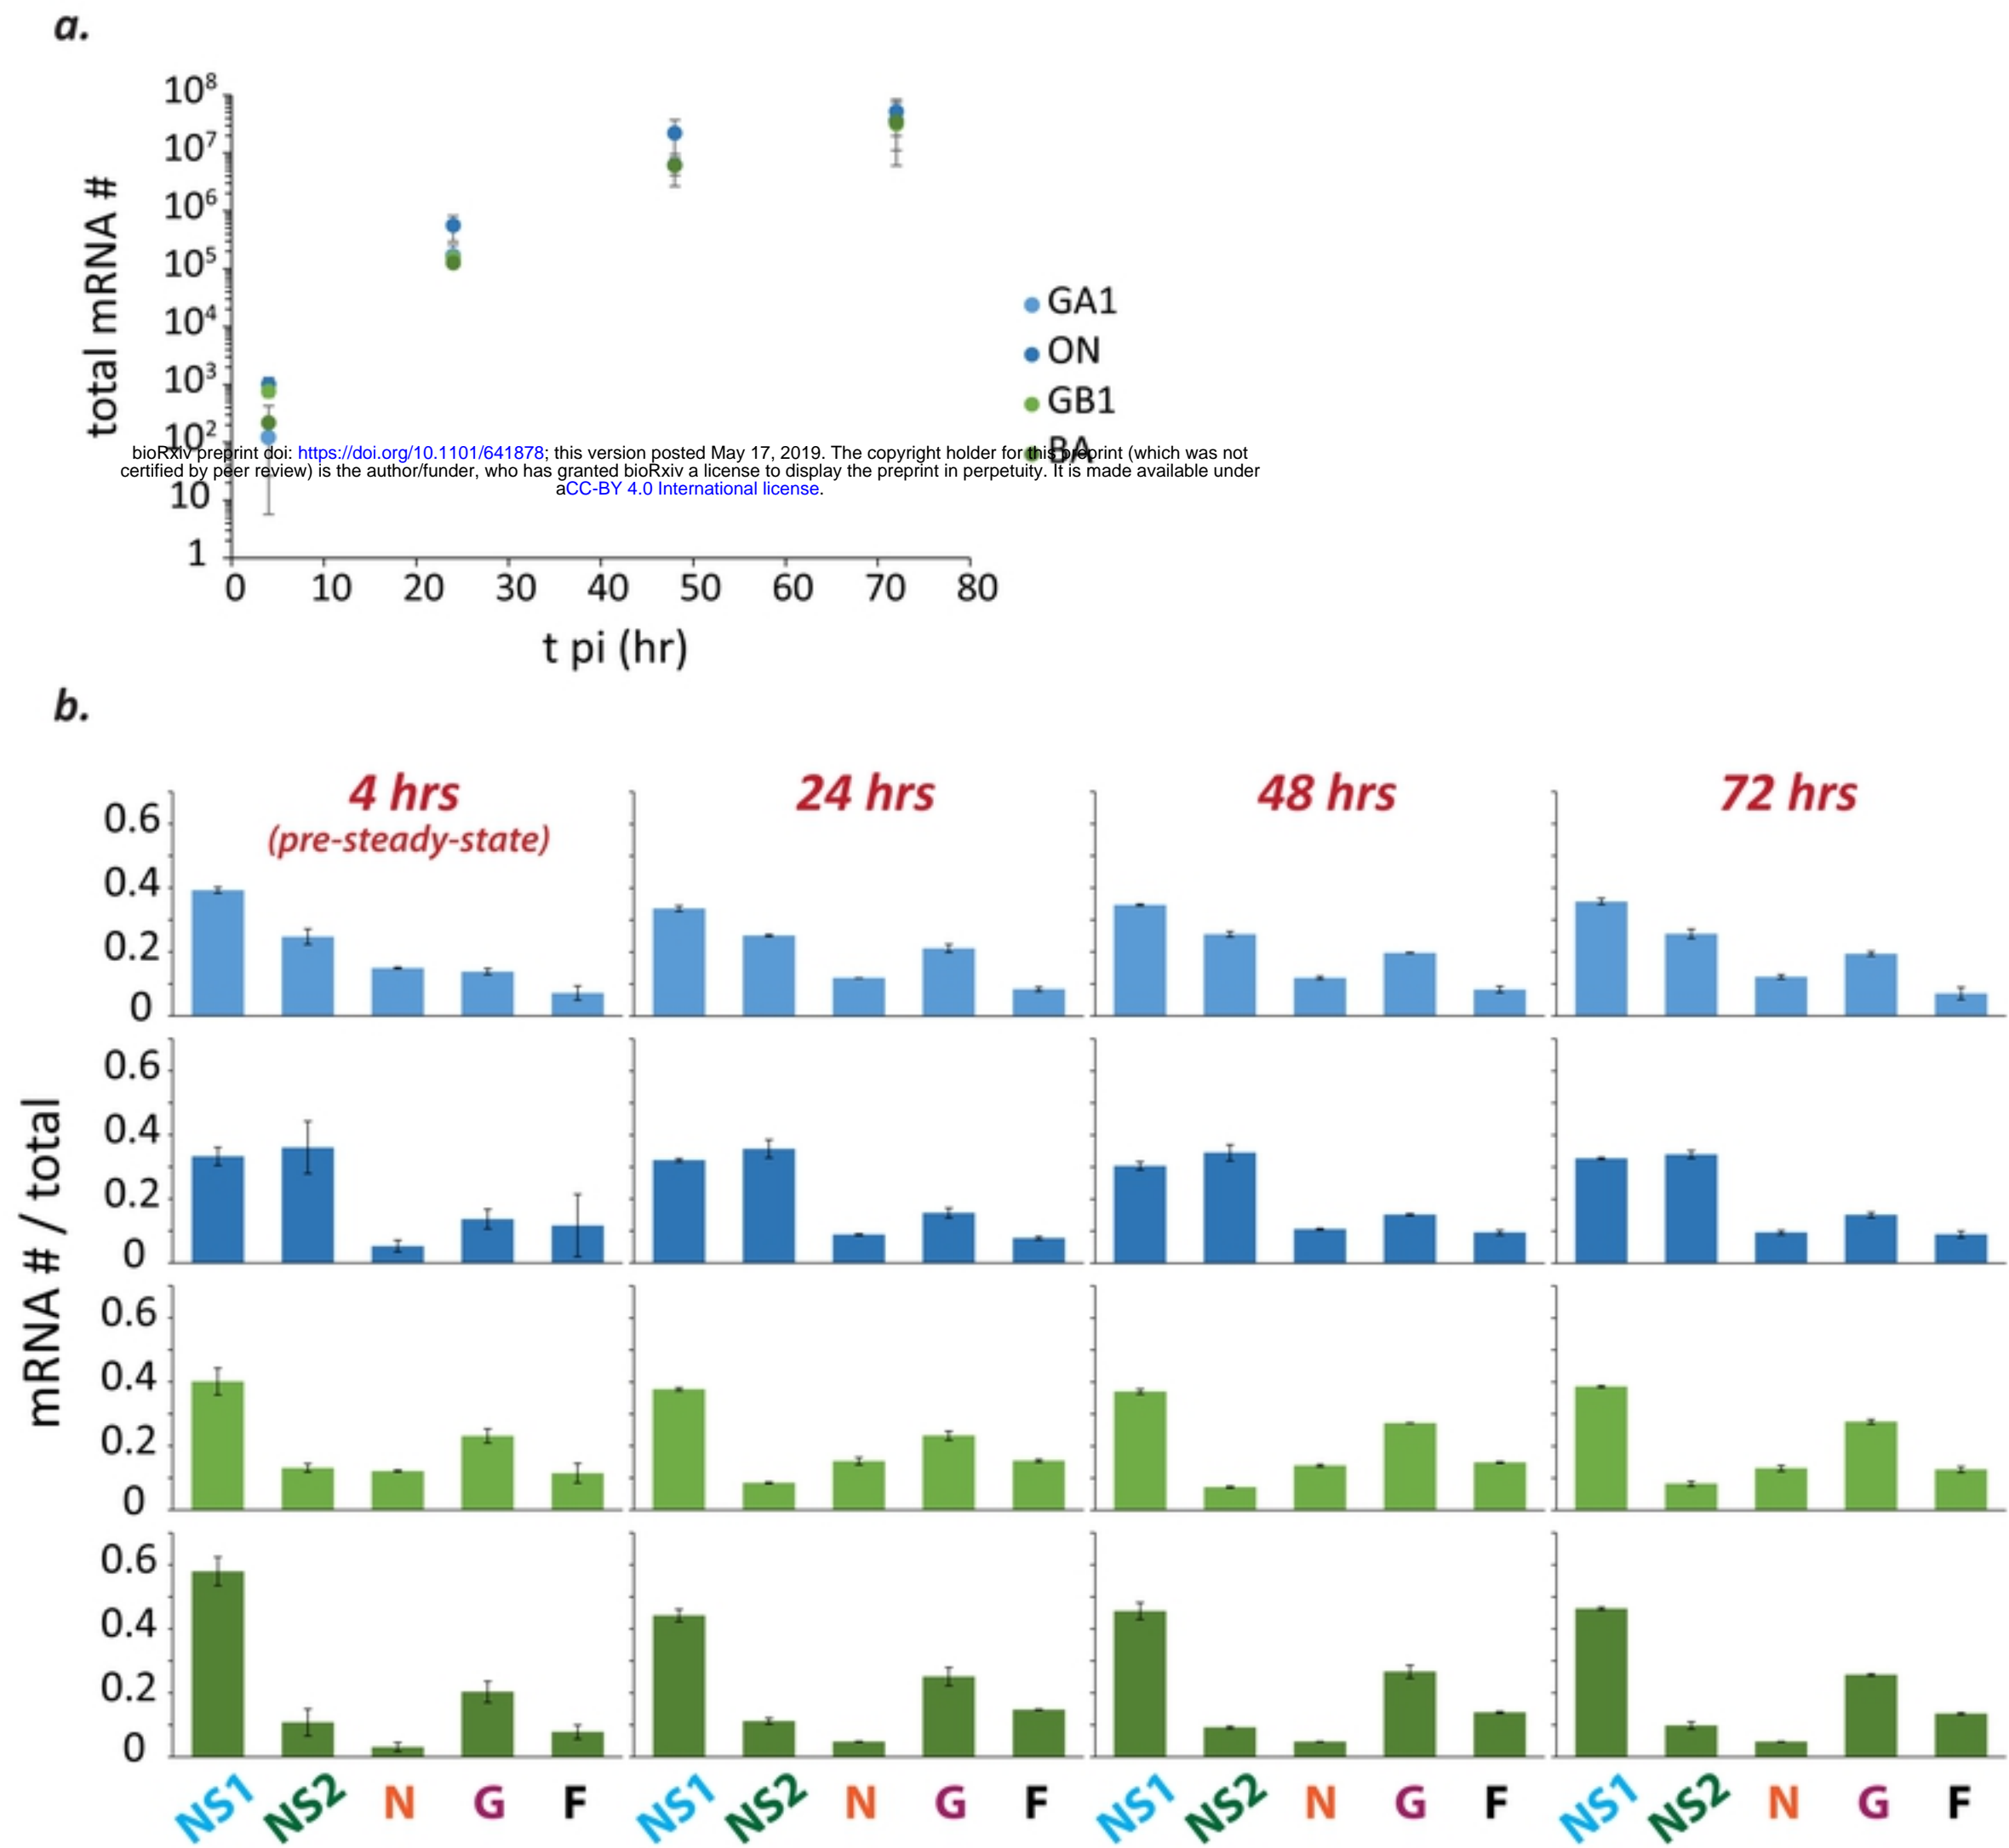

Fig 2.

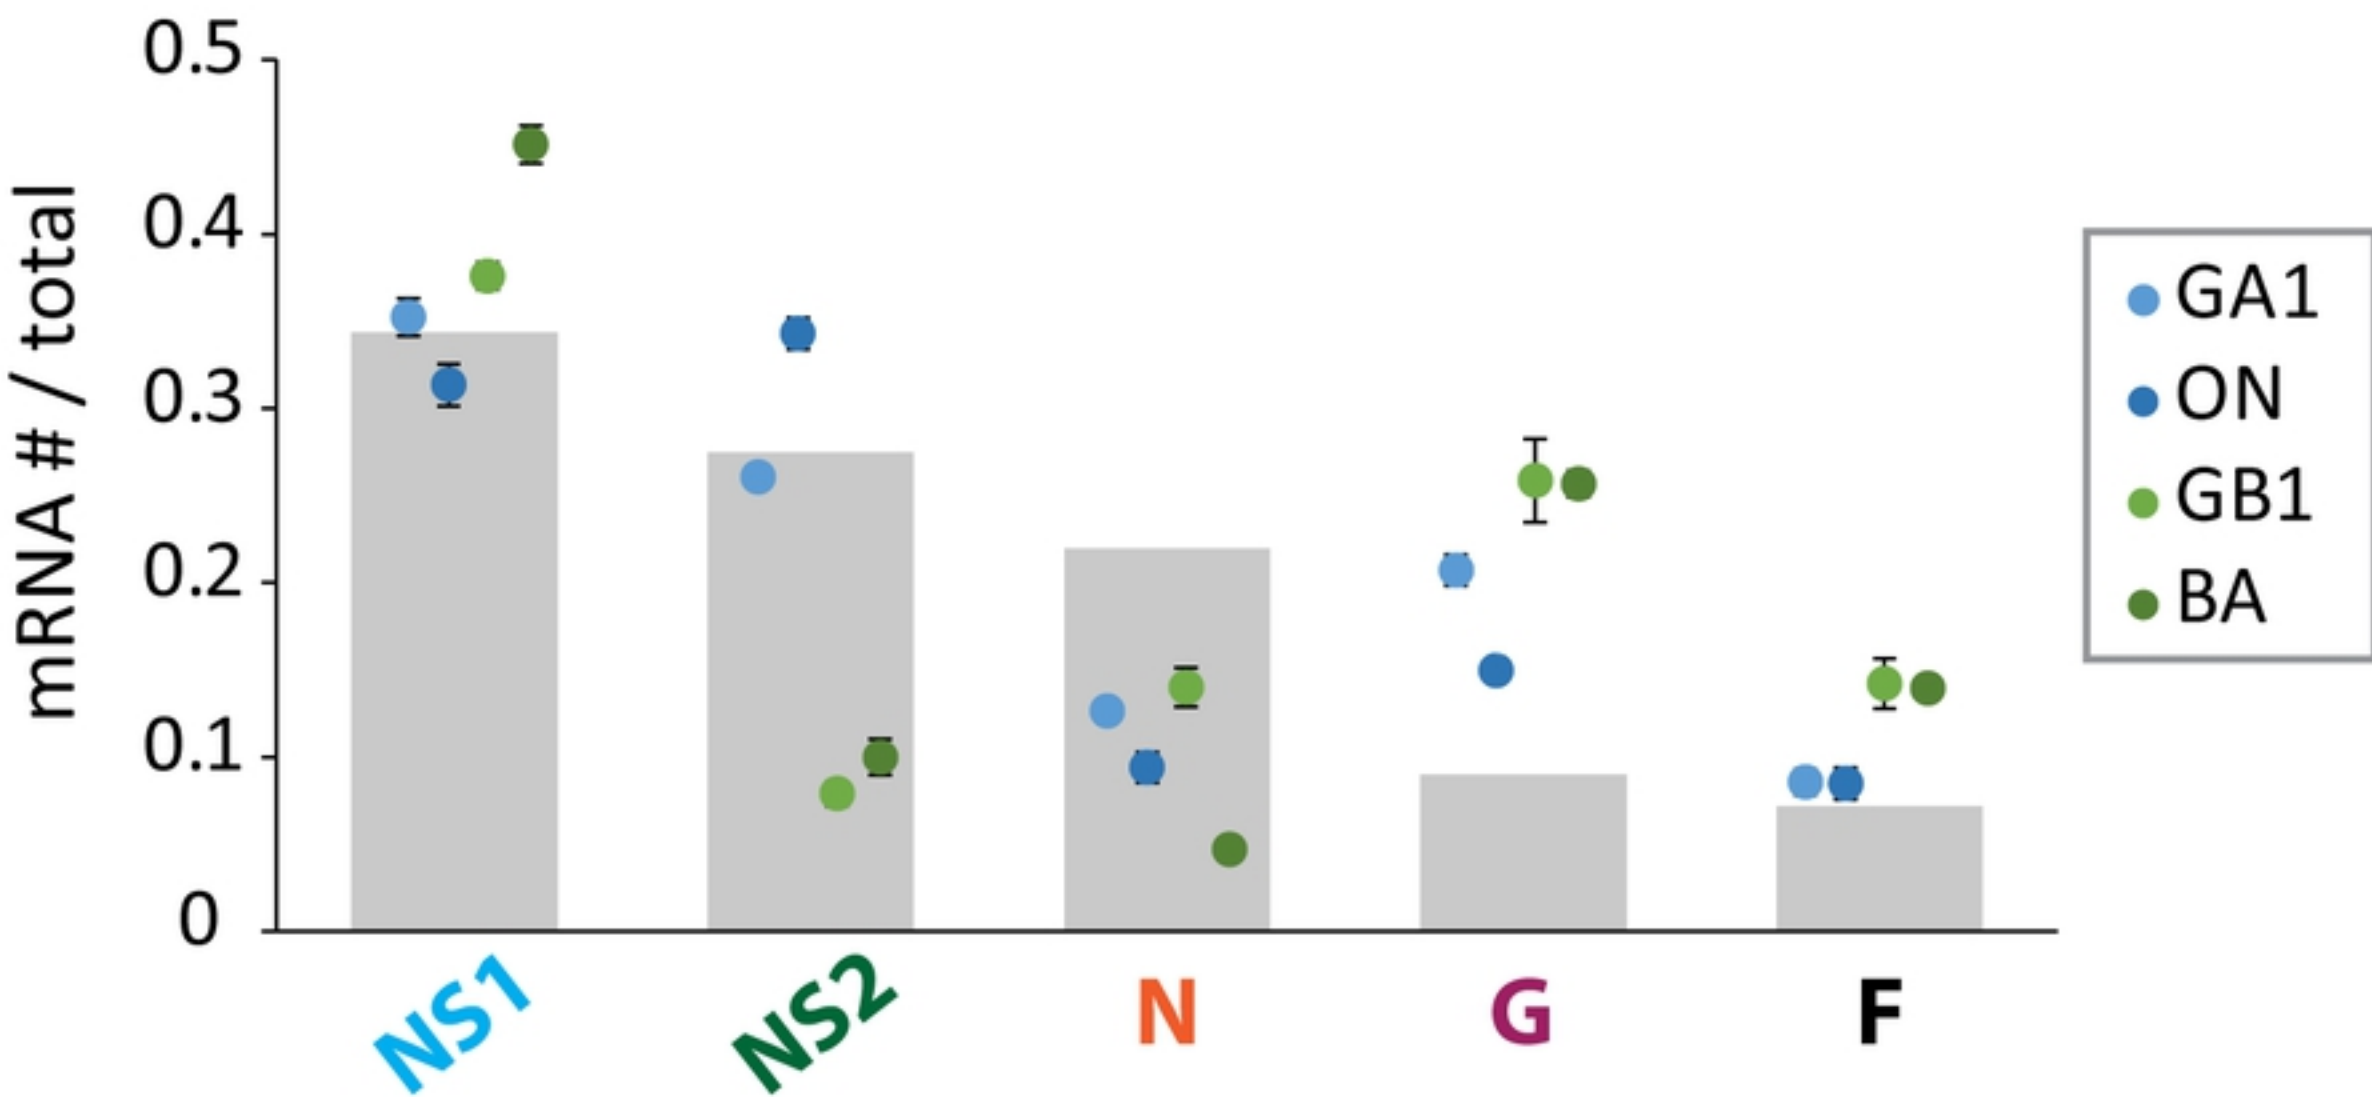

**Fig 3.**

Fig 3

**a.**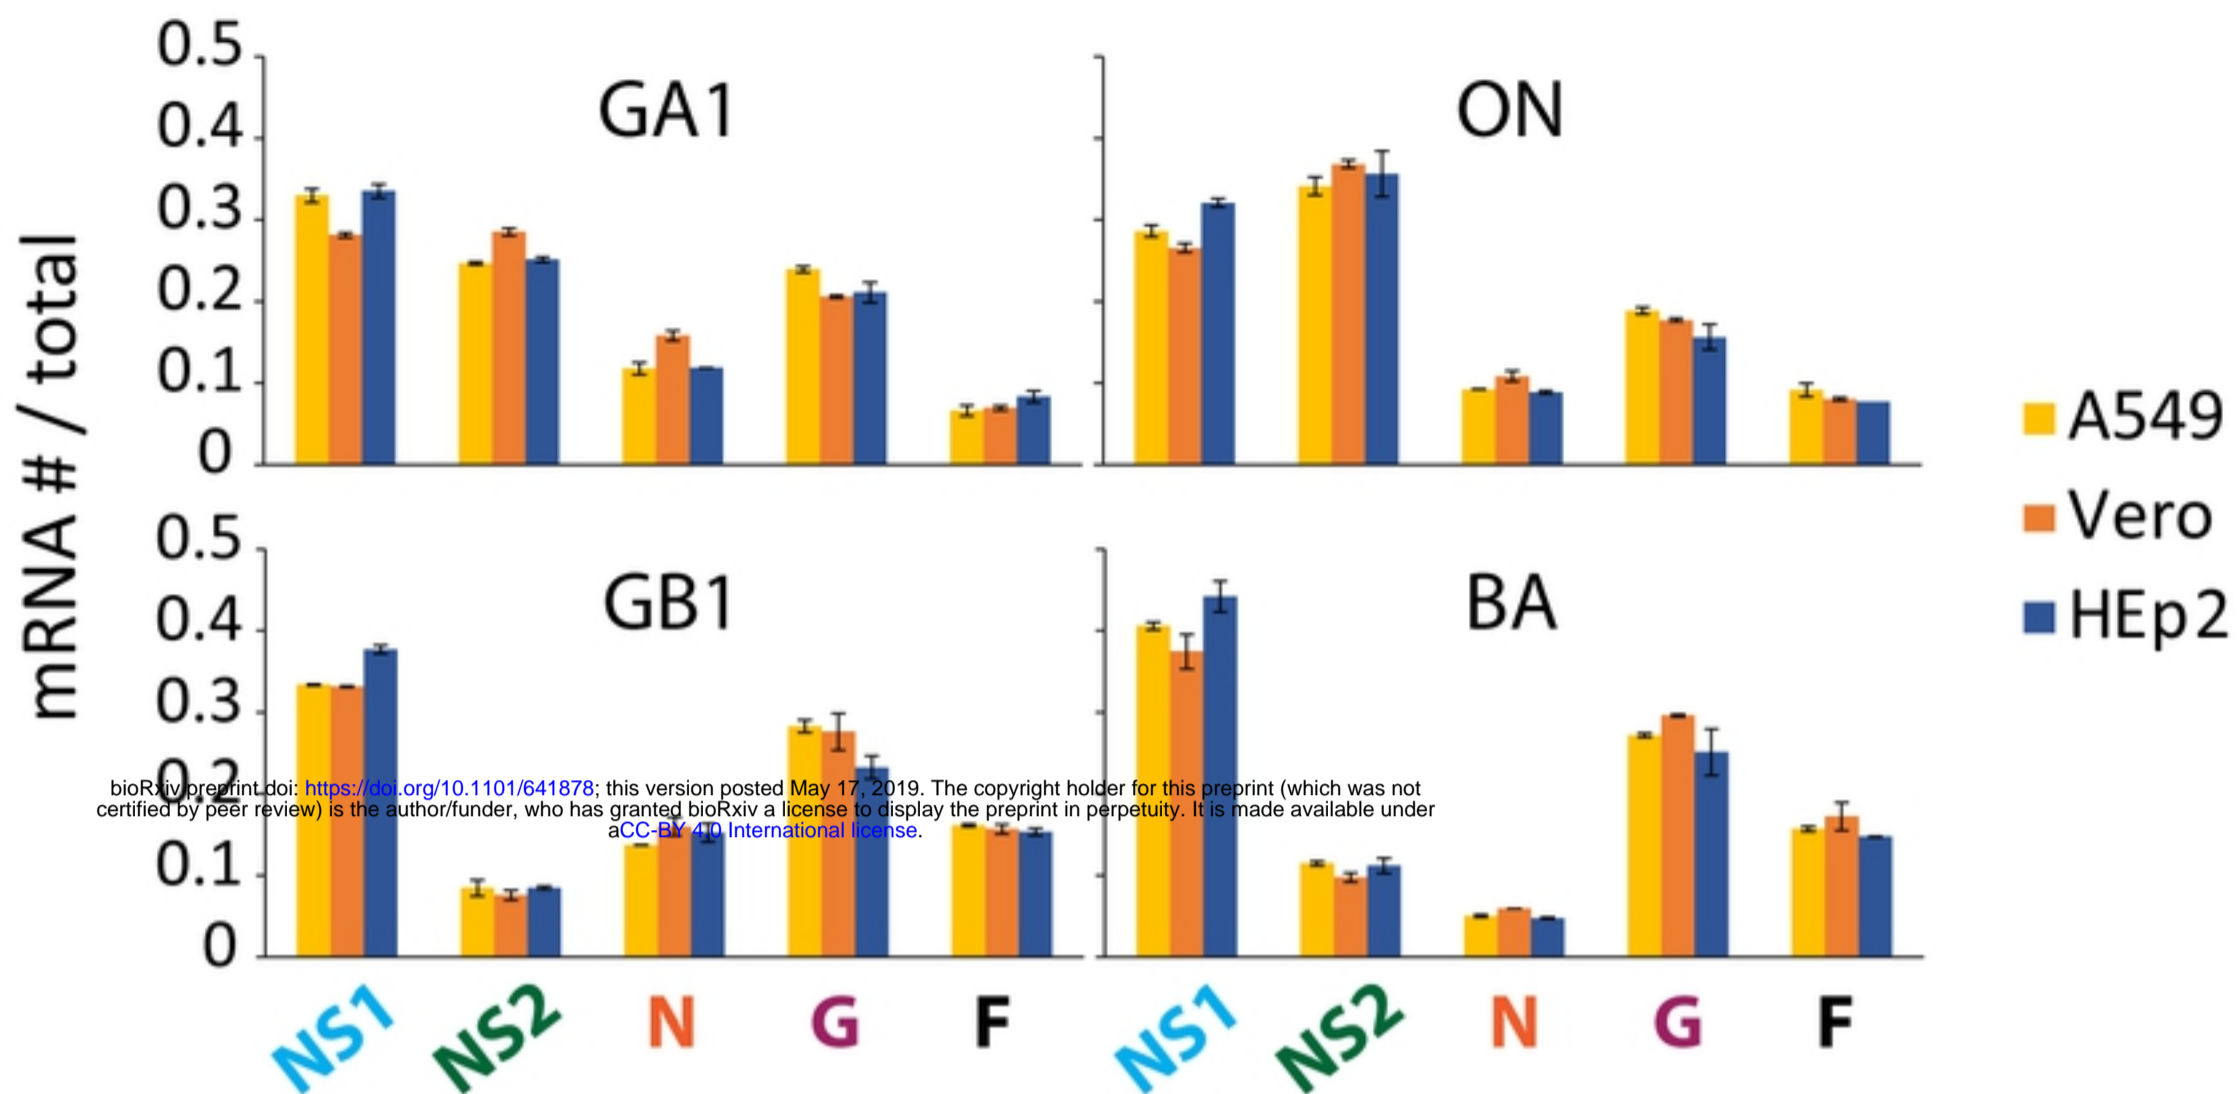**b.**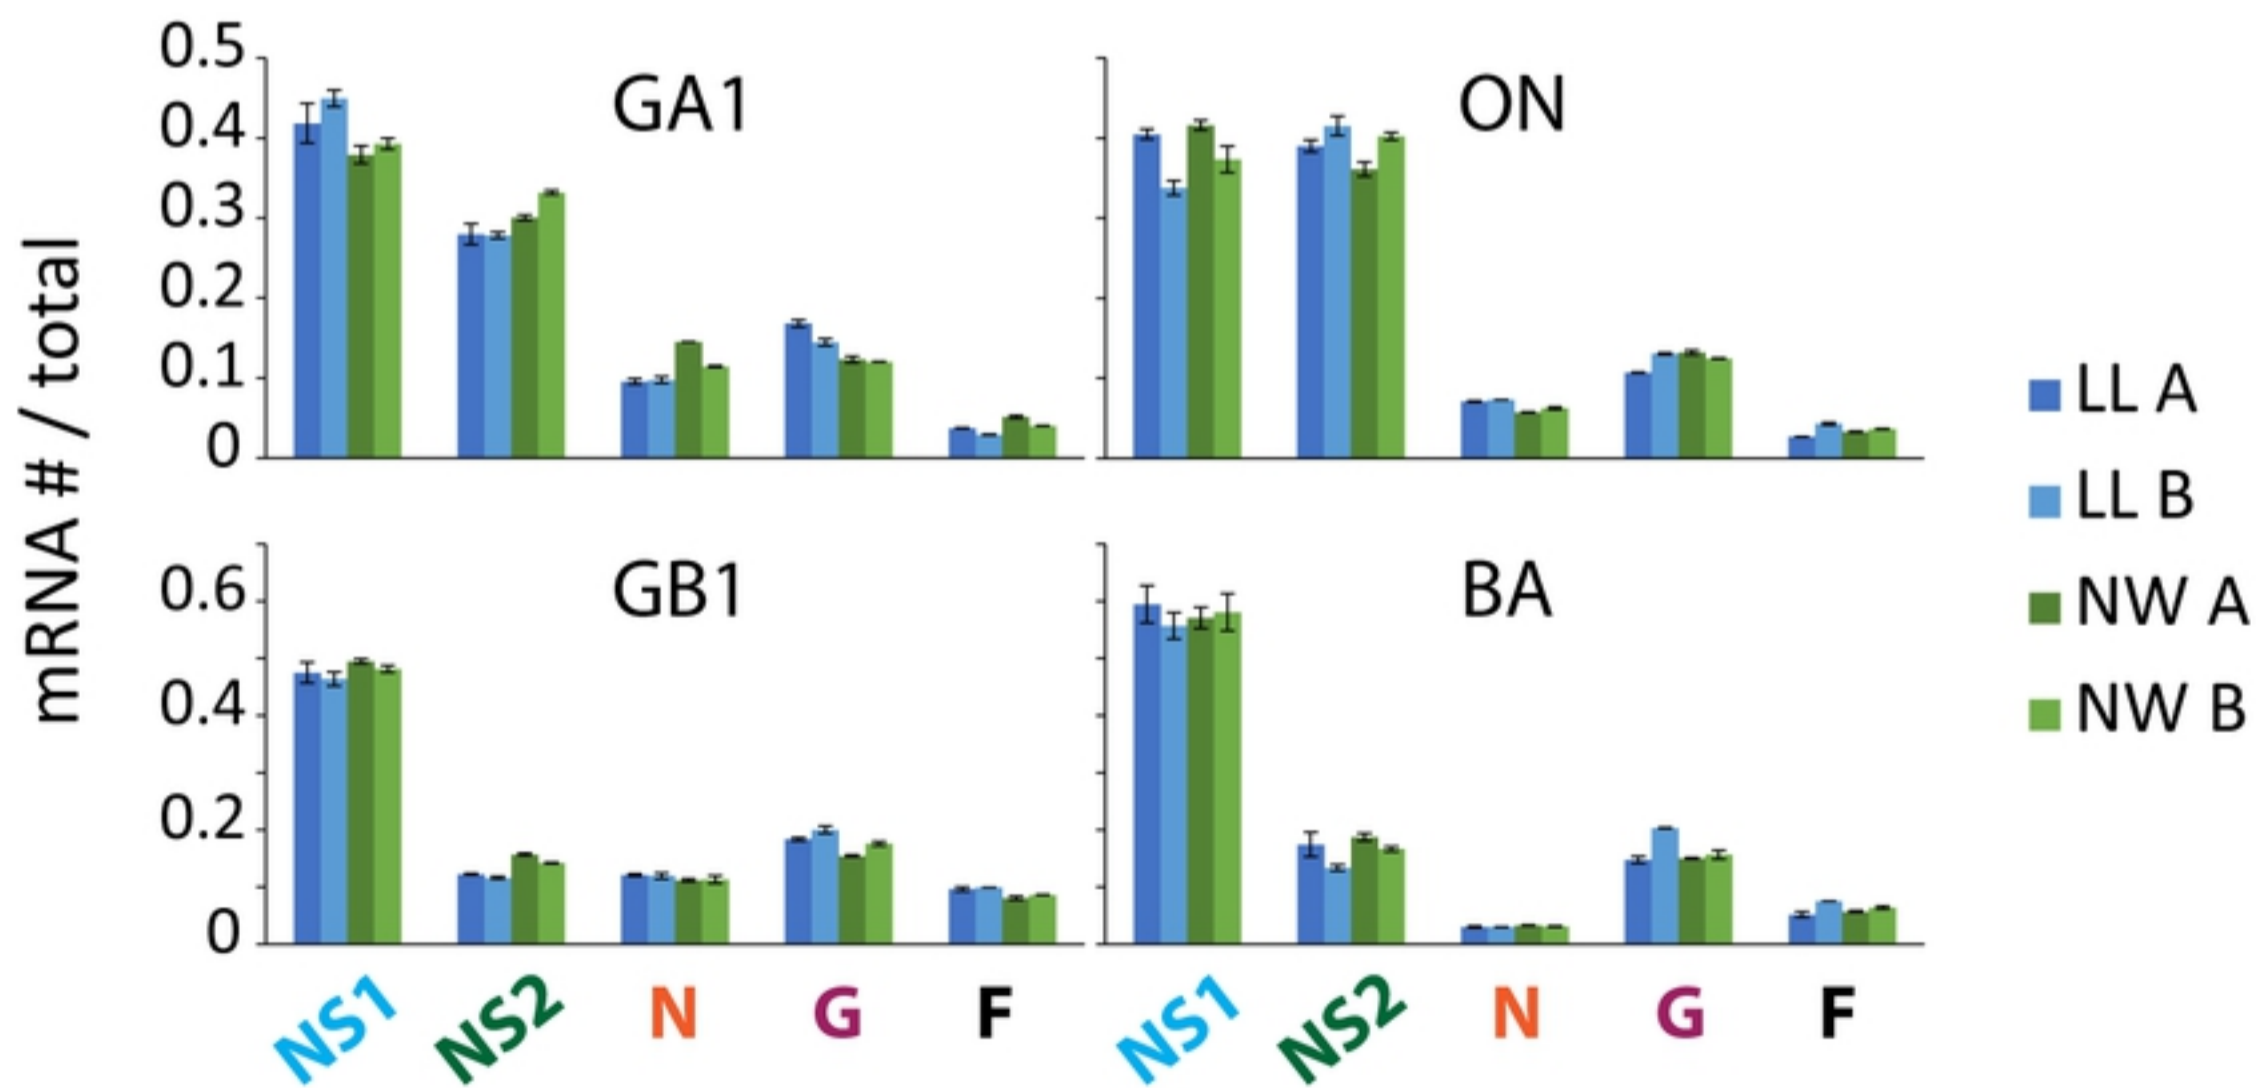**Fig 4.**

Fig 4



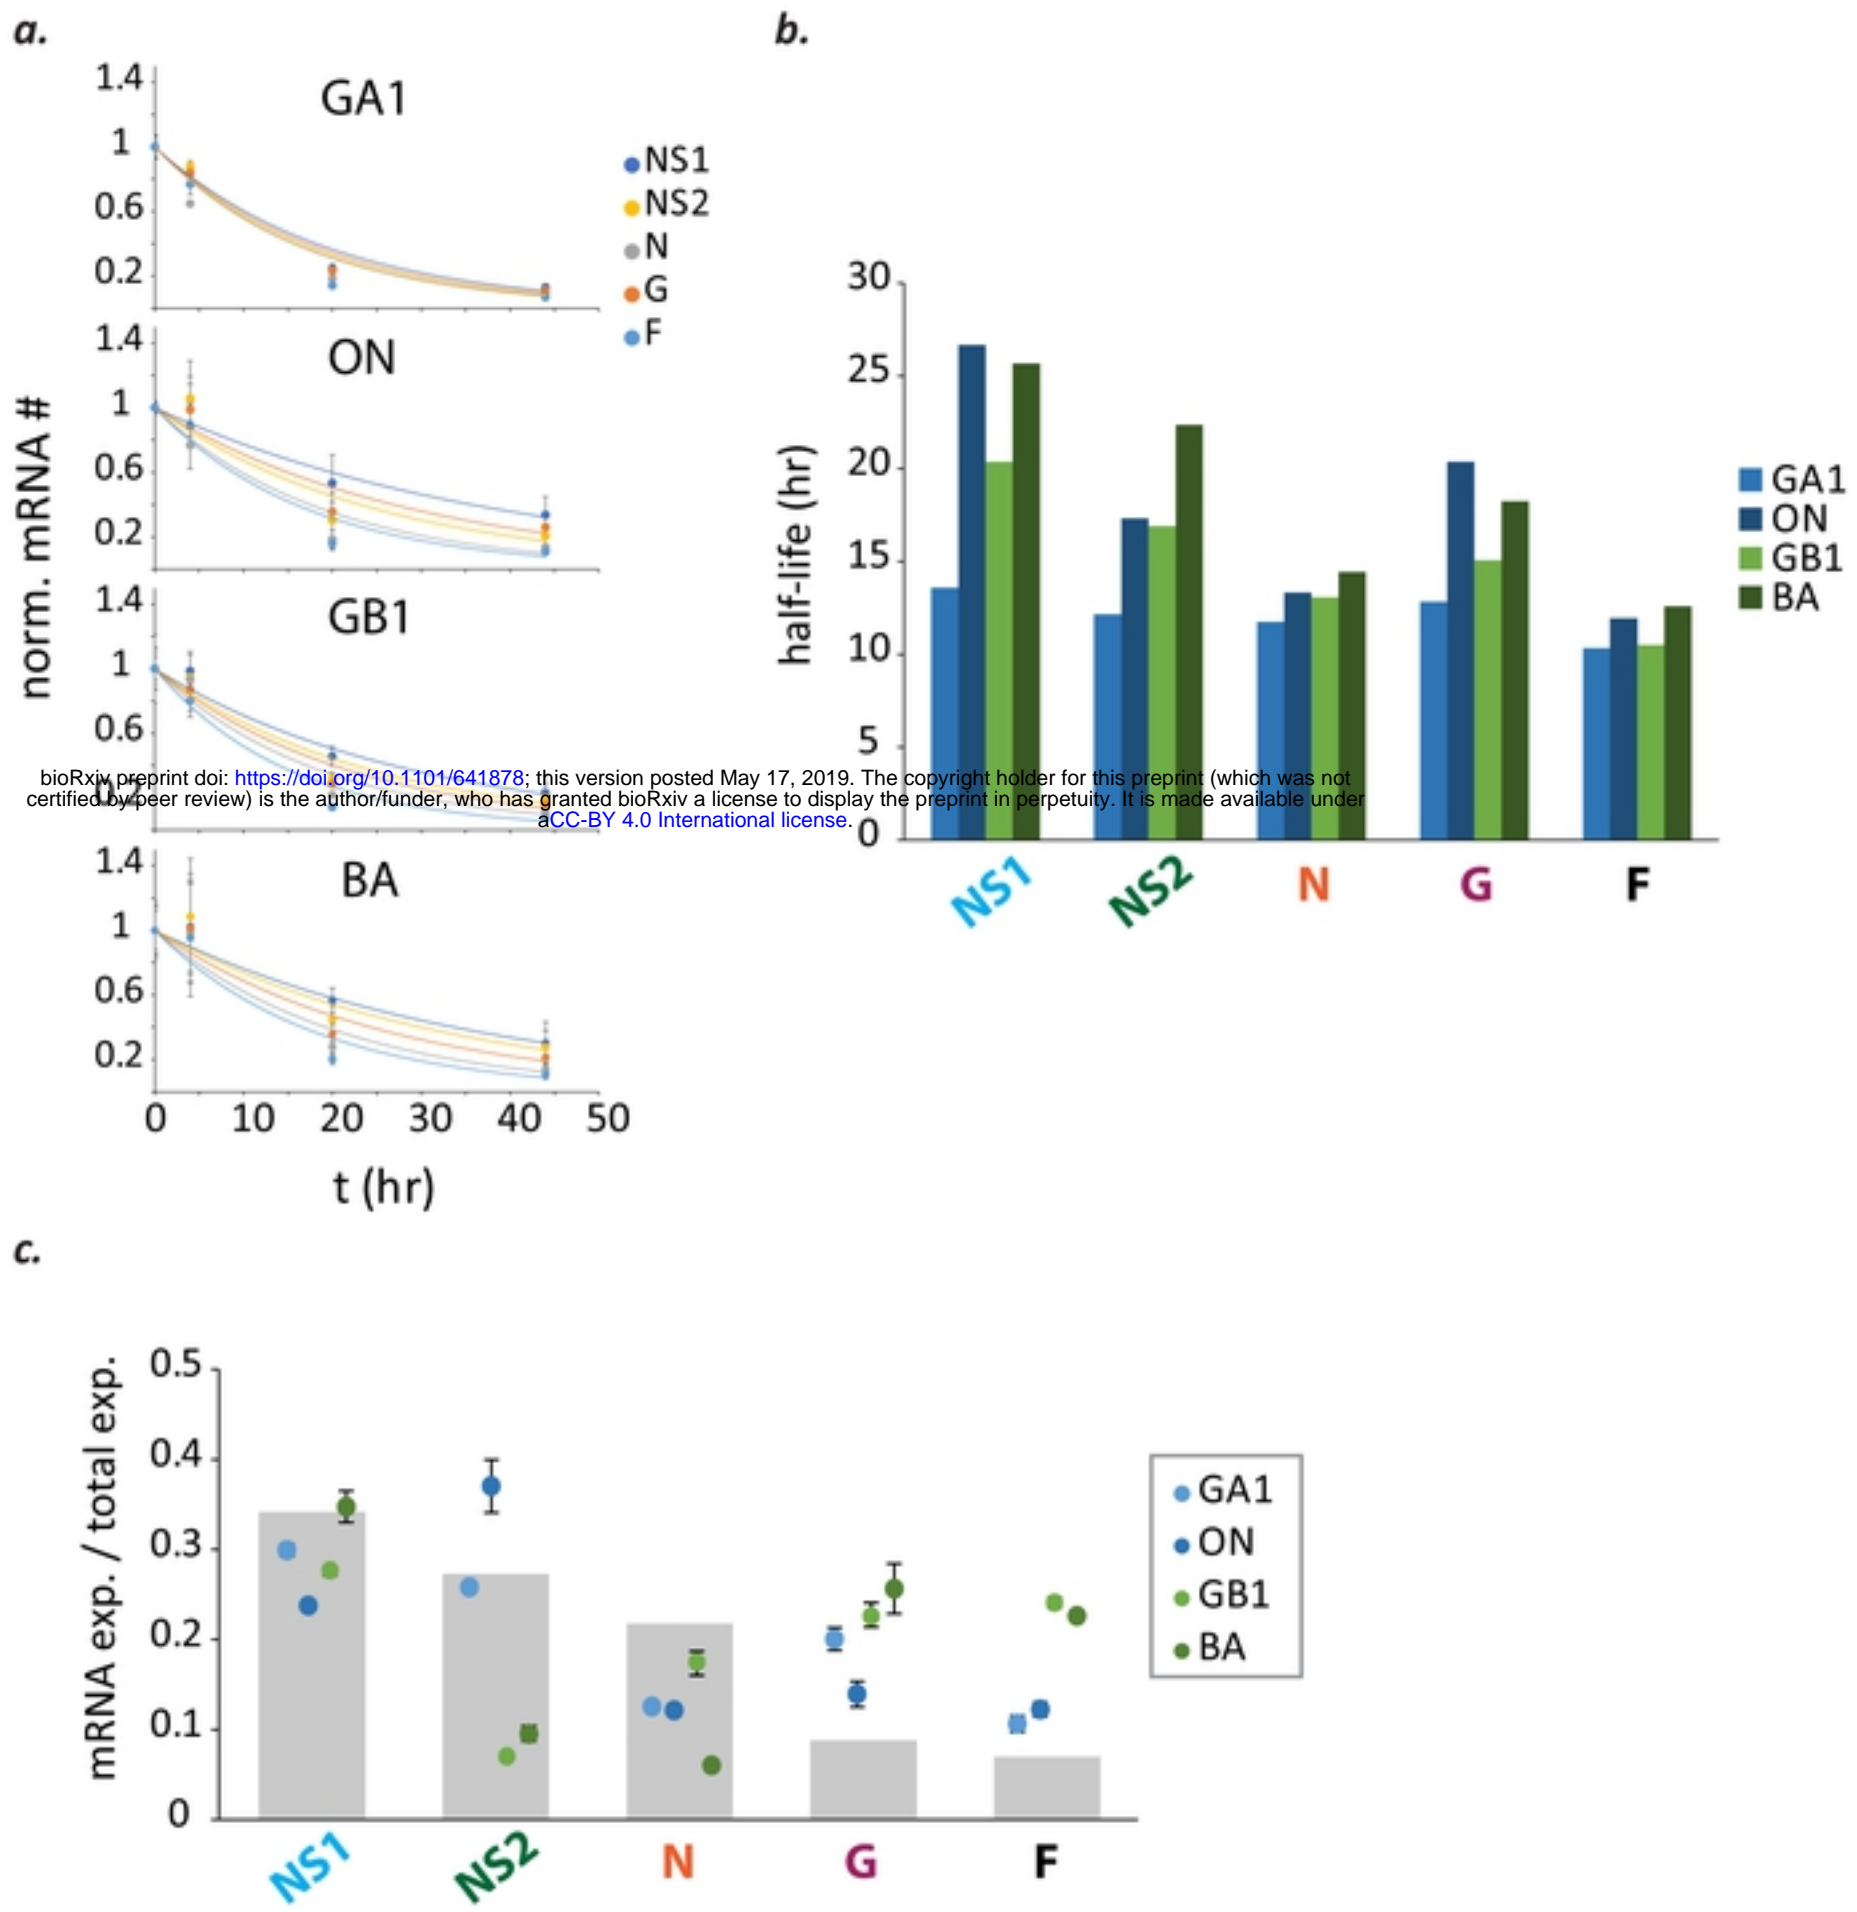

bioRxiv preprint doi: <https://doi.org/10.1101/641878>; this version posted May 17, 2019. The copyright holder for this preprint (which was not certified by peer review) is the author/funder, who has granted bioRxiv a license to display the preprint in perpetuity. It is made available under aCC-BY 4.0 International license.

Fig 5.

**a.**

|            | <u>NS1, NS2, N, F</u> | <u>G</u>    |
|------------|-----------------------|-------------|
| <b>GA1</b> | CCCCGUUUUAU           | CCCCGUUUUAC |
| <b>ON</b>  | .....                 | .....       |
| <b>GB1</b> | .....                 | .....       |
| <b>BA</b>  | .....                 | .....       |

**b.**

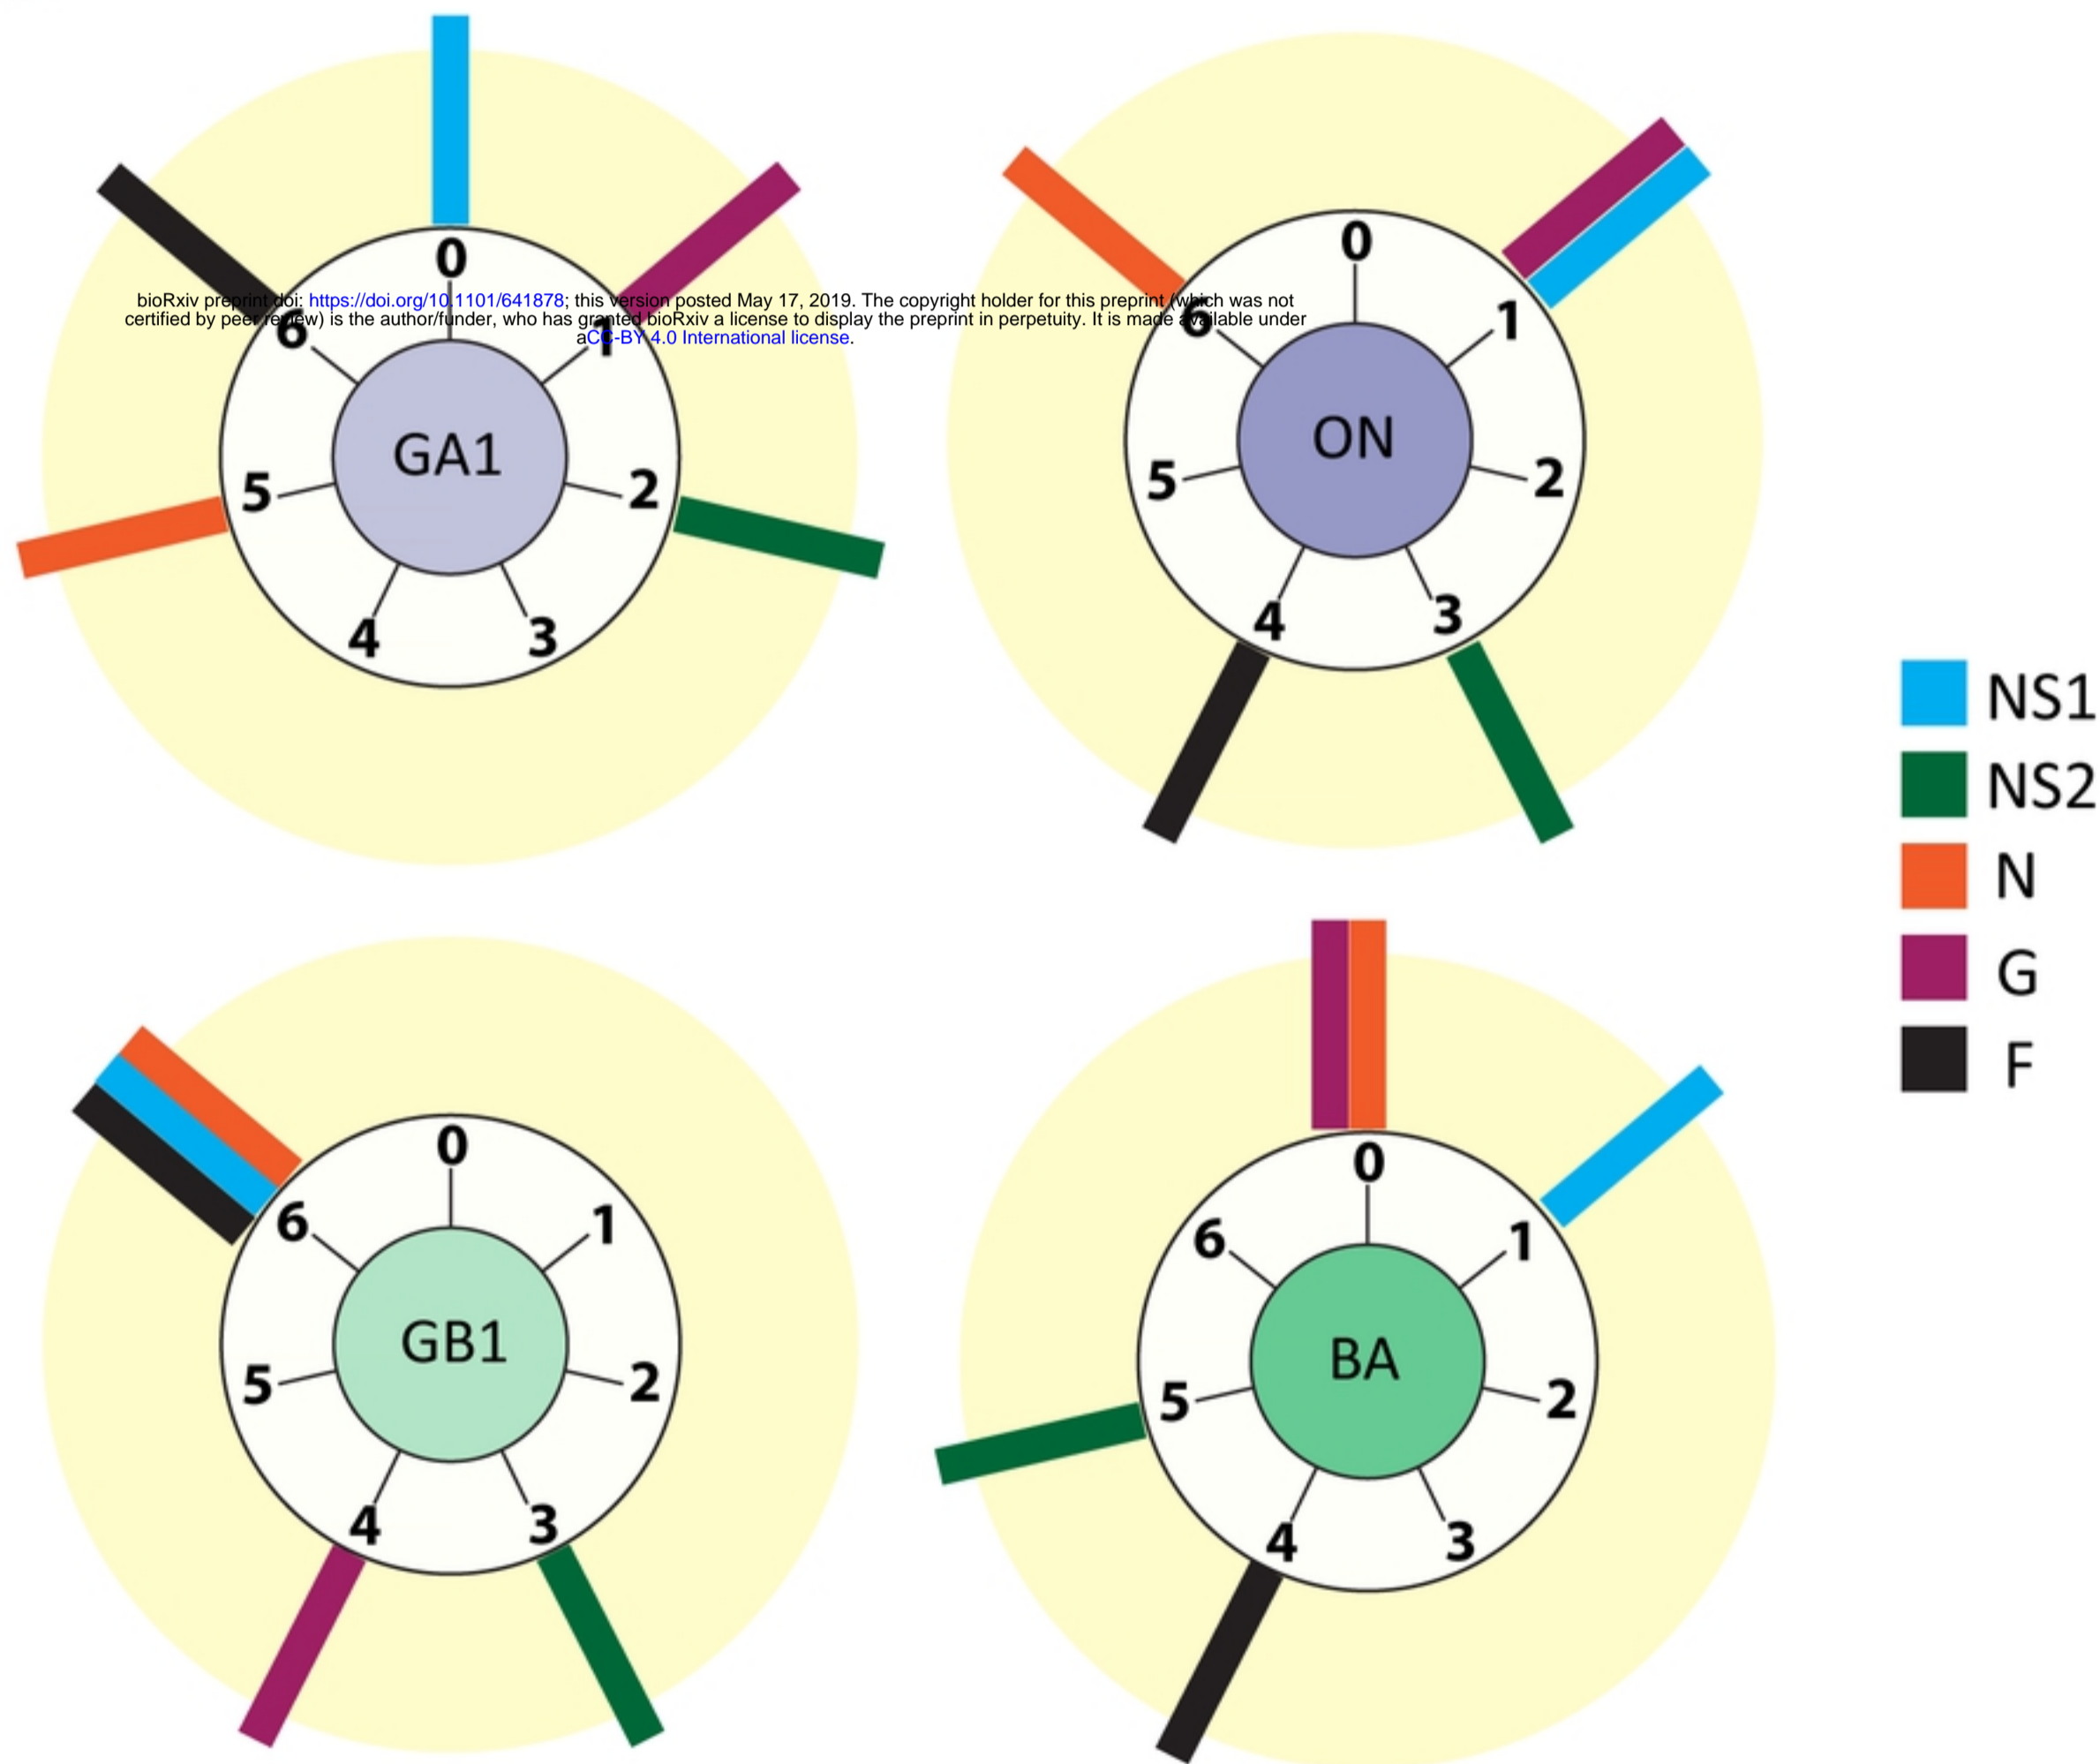

**Fig 6.**

Fig 6

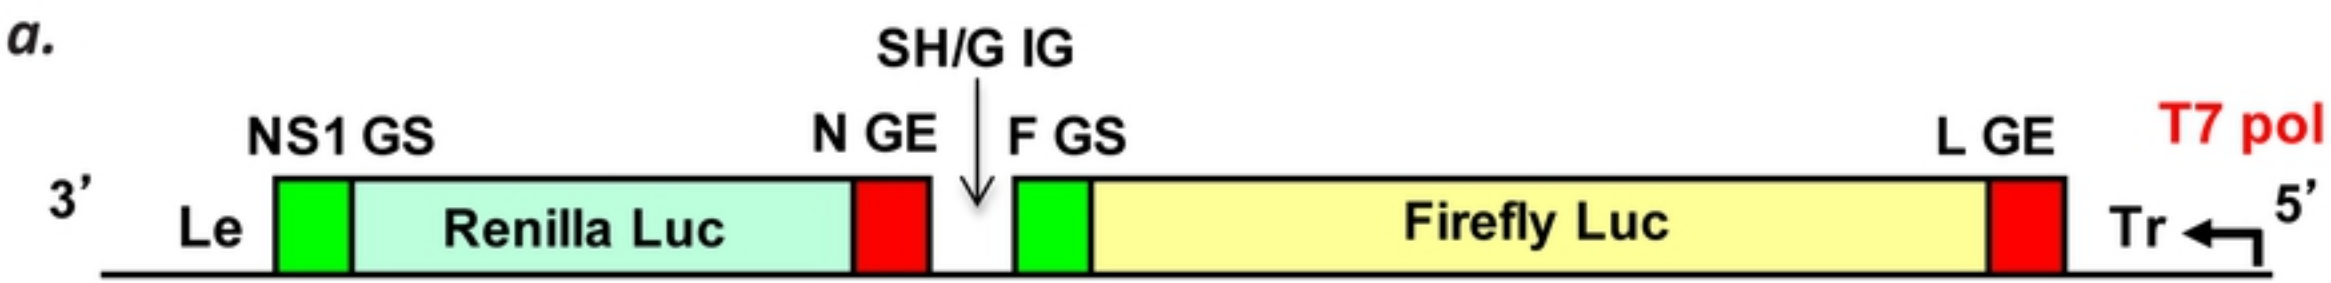

b.

NP0 *GUAUUGUUACUUGAUCCUAUAGUUCUGAUUGUUUACCCCGUUUAUUGU*  
 NP1 *GUAUUGUUACUUGAUCCUAUAGUUCUGAUUGUUUACCCCGUUUAUUGUA*  
 NP2 *GUAUUGUUACUUGAUCCUAUAGUUCUGAUUGUUUACCCCGUUUAUUGUUA*  
 NP3 *GUAUUGUUACUUGAUCCUAUAGUUCUGAUUGUUUUACCCCGUUUAUUGUGUA*  
 NP4 *GUAUUGUUACUUGAUCCUAUAGUUCUGAUUGUUUUACCCCGUUUAUUGUUGUA*  
 NP5 *GUAUUGUUACUUGAUCCUAUAGUUCUGAUUGUUUACCCCGUUUAUUGUUUGUA*  
 NP6 *GUAUUGUUACUUGAUCCUAUAGUUCUGAUUGUUUACCCCGUUUAUUGUAUUGUA*  
 NP7 *GUAUUGUUACUUGAUCCUAUAGUUCUGAUUGUUACCCCGUUUAUUGUUUAUUGUA*

bioRxiv preprint doi: <https://doi.org/10.1101/641878>; this version posted May 17, 2019. The copyright holder for this preprint (which was not certified by peer review) is the author/funder, who has granted bioRxiv a license to display the preprint in perpetuity. It is made available under aCC-BY 4.0 International license.

c.

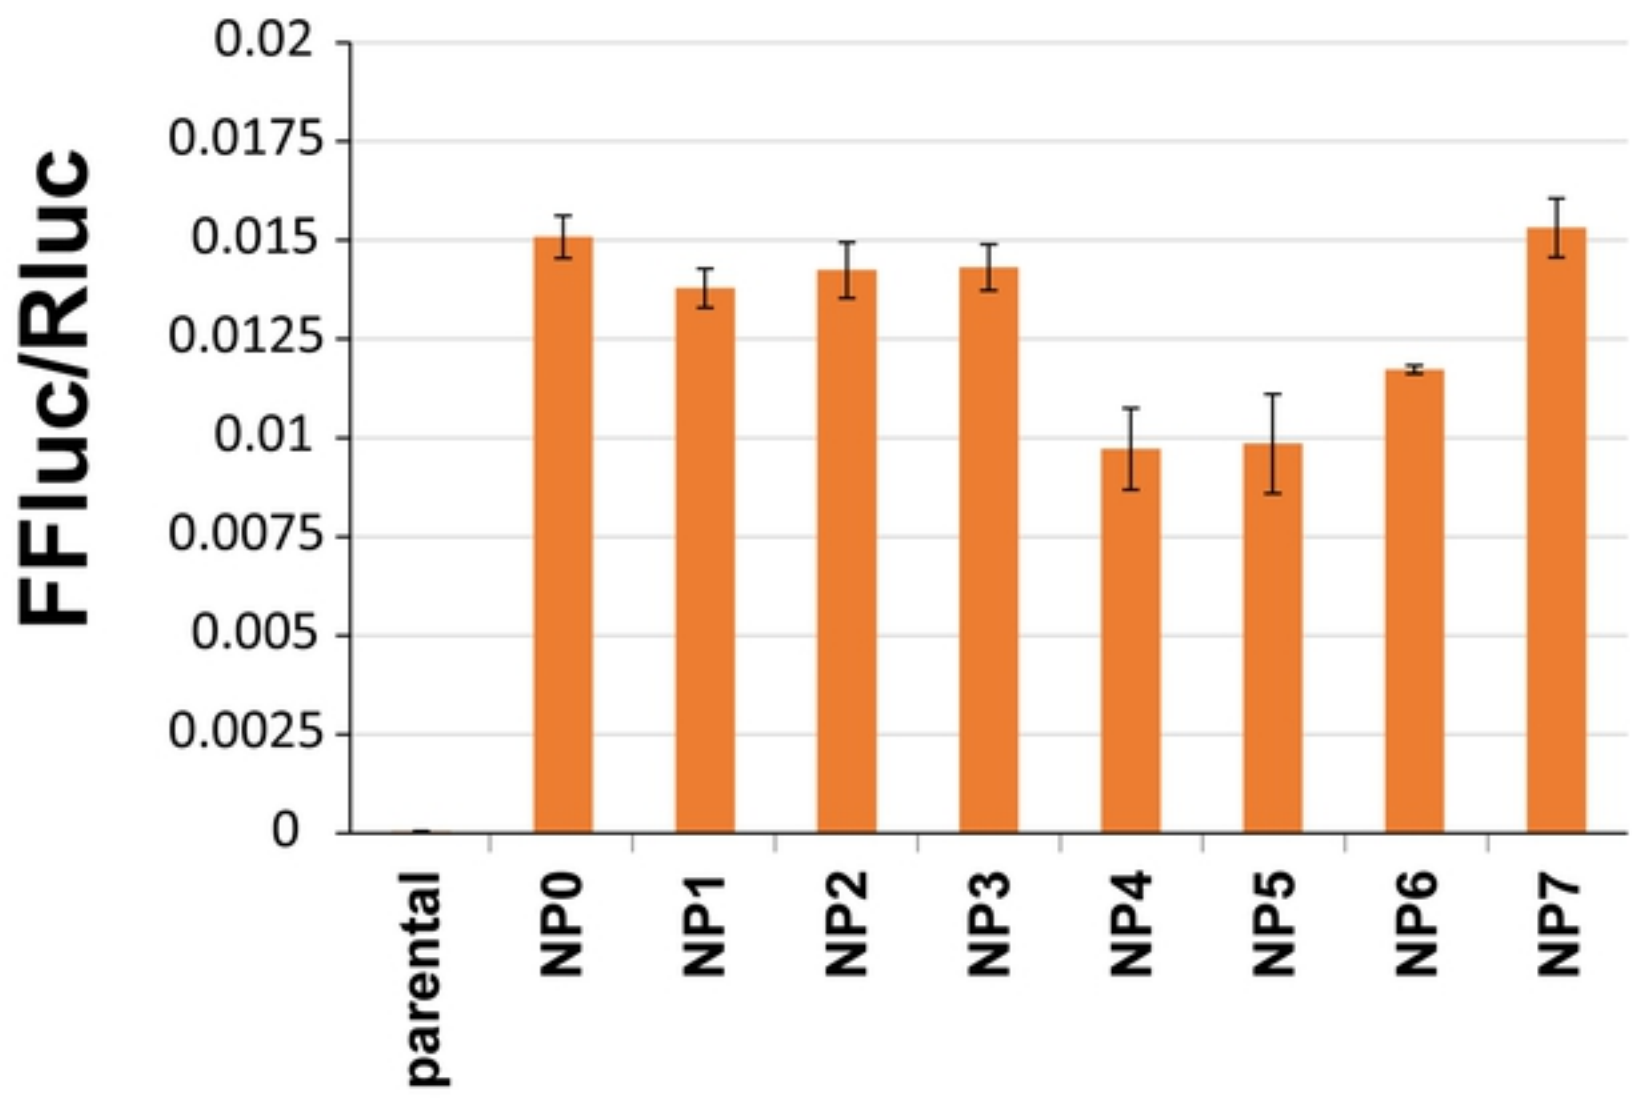

Fig 7.

Fig 7
